# Supplementary material for: Palladium-catalyzed three-component coupling of arynes with allylic acetates or halides and terminal alkynes promoted by cuprous iodide
Source: Royal Society of Chemistry journal article supplement (doi:10.1039/b800118a), 2008-01-01

# **Palladium-catalyzed three-component coupling of arynes with allylic acetates or halides and terminal alkynes promoted by cuprous iodide**

**Sivakolundu Bhuvaneswari, Masilamani Jeganmohan, Ming-Che Yang and  
Chien-Hong Cheng\***

Department of Chemistry, National Tsing Hua University, Hsinchu 30013, Taiwan

E-mail: chcheng@mx.nthu.edu.tw

## **Electronic Supplementary Information (ESI)**

### **Table of Contents**

|                |                                                                         |
|----------------|-------------------------------------------------------------------------|
| Page S2        | Optimization studies                                                    |
| Page S2 - S3   | Experimental section                                                    |
| Page S3 - S10  | Spectral data of all compounds                                          |
| Page S11       | References                                                              |
| Page S12 – S31 | Copies of $^1\text{H}$ and $^{13}\text{C}$ NMR spectra of all compounds |

## Experimental section

**General.** All reactions were conducted under nitrogen atmosphere on a dual-manifold Schlenk line unless otherwise mentioned and in oven-dried glass wares. All solvents were dried according to known methods and distilled prior to use.<sup>1</sup> Starting materials substituted benzyne precursor **1a-e**<sup>2</sup> were synthesized according to the literature procedures. Other reagents were commercially available and used as purchased.

**Optimization studies.** Various monodentate and bidentate phosphine palladium complexes were examined in the presence of CuI (3.0 mol %). The reaction conditions are: 2-trimethylsilylphenyl triflate (**1a**), allyl acetate (**2a**) and 1-heptyne (**3a**) in the presence of a Pd complex (3 mol%), and CsF (3.0 equiv.) at 50 °C for 5 h. The results show that monodentate phosphine palladium complex PdCl<sub>2</sub>(PPh<sub>3</sub>)<sub>2</sub> was active for the present reaction but gave **4a** in 60% yields. Pd(PPh<sub>3</sub>)<sub>4</sub> gave **4a** in very high 95% yield. Bidentate phosphine complex Pd(dba)<sub>2</sub>/dppe (3 mol %) was equally active affording **4a** in 93% yield. Other bidentate phosphine palladium complex Pd(dba)<sub>2</sub>/dppm, dppp and dppb were less active affording **4a** in 45, 75 and 35% yields, respectively. The studies revealed that Pd(PPh<sub>3</sub>)<sub>4</sub> and Pd(dba)<sub>2</sub>/dppe are the most suitable catalysts for the present reaction.

In the presence of Pd(PPh<sub>3</sub>)<sub>4</sub> and CuI, various allylating reagents were tested. Allyl acetate, allyl chloride and allyl bromide were equally active for the present reaction affording **4a** in 95, 92 and 94% yields, respectively. Allyl carbonate and allyl alcohol failed to give the expected three component coupling products. The result for allyl carbonate is surprising, since this reagent is generally more reactive than allyl acetate. On the basis of these optimization studies, we chose Pd(PPh<sub>3</sub>)<sub>4</sub> as the catalyst, CuI as promoter and CH<sub>3</sub>CN as solvent for this palladium-catalyzed three-component coupling reaction.

**General procedure for the coupling reaction of benzyne with allylic acetates or**

**halides and terminal alkynes.** A sealed tube containing Pd(PPh<sub>3</sub>)<sub>4</sub> (0.030 mmol, 3.0 mol %), CuI (0.030 mmol, 3.0 mol %) and CsF (3.00 mmol) was evacuated and purged with nitrogen gas three times. Freshly distilled CH<sub>3</sub>CN (3.0 mL), benzyne precursor **1** (1.00 mmol), allyl acetate or halide **2** (1.30 mmol) and terminal alkyne **3** (1.1 mmol) were sequentially added to the system and the reaction mixture was allowed to stir at 50 °C for 5 h. The mixture was filtered through a short Celite pad and washed with dichloromethane several times. The filtrate was concentrated and the residue was purified on a silica gel column using hexanes-ethyl acetate as eluent to afford the substituted 1-allyl-2-alkynylbenzene derivative **4**.

Spectral data and copies of <sup>1</sup>H and <sup>13</sup>C NMR spectra of all compounds are listed below.

**1-Allyl-2-(hept-1-ynyl)benzene (4a).**

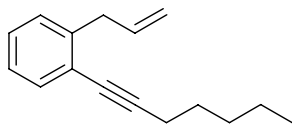

Colorless oil; <sup>1</sup>H NMR (400 MHz, CDCl<sub>3</sub>): δ 7.41 (d, *J* = 7.2 Hz, 1 H), 7.18 - 7.12 (m, 3 H), 6.03 – 5.96 (m, 1 H), 5.12 - 5.05 (m, 2 H), 3.56 (d, *J* = 6.8 Hz, 2 H), 2.42 (t, *J* = 6.4 Hz, 2 H), 1.62 – 1.58 (m, 2 H), 1.52 – 1.40 (m, 2 H), 1.38 -1.27 (m, 2 H), 0.97 (t, *J* = 7.2 Hz, 3 H). <sup>13</sup>C NMR (100 MHz, CDCl<sub>3</sub>): δ 141.7, 136.8, 132.1, 128.6, 127.6, 125.9, 115.6, 94.4, 79.1, 38.7, 31.1, 28.5, 22.2, 19.5, 13.9; HRMS: calcd for C<sub>16</sub>H<sub>20</sub> 212.1565, found 212.1560.

**1-(Hept-1-ynyl)-2-(2-methylallyl)benzene (4b).**

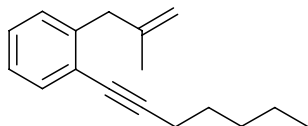

Colorless oil; <sup>1</sup>H NMR (500 MHz, CDCl<sub>3</sub>): δ 7.37 (d, *J* = 7.0 Hz, 1 H), 7.19 - 7.12 (m, 3 H), 4.80 (s, 1 H), 4.65 (s, 1 H), 3.50 (s, 2 H), 2.41 (t, *J* = 7.5 Hz, 2 H), 1.70 (s, 3 H), 1.63 – 1.57 (m, 2 H), 1.46 – 1.32 (m, 4 H), 0.90 (t, *J* = 7.5 Hz, 3 H); <sup>13</sup>C NMR (125

MHz, CDCl<sub>3</sub>):  $\delta$  144.8, 141.4, 132.1, 128.9, 127.5, 125.9, 124.0, 111.7, 94.0, 79.3, 42.4, 31.1, 28.5, 22.3, 22.2, 19.5, 13.9; HRMS: calcd for C<sub>17</sub>H<sub>22</sub> 226.1722, found 226.1725.

**1-((*E*)-But-2-enyl)-4,5-dimethyl-2-(2-phenylethynyl)benzene (4c) and 1-(But-3-en-2-yl)-4,5-dimethyl-2-(2-phenylethynyl)benzene (4d).**

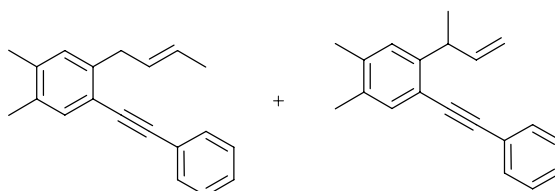

Colorless oil; <sup>1</sup>H NMR (400MHz, CDCl<sub>3</sub>):  $\delta$  7.54 (d, *J* = 6.2 Hz, 2 H), 7.38 - 7.24 (m, 4 H), 7.02 (s, 1 H), 6.16 - 6.07 (m, 1 H), 5.70 - 5.57 (m, 2 H), 5.20 (dd, *J* = 16.4, 6.4 Hz, 2 H), 4.10 - 4.05 (m, 1 H), 3.53 (d, *J* = 6.4 Hz, 2 H), 2.32 (s, 3 H), 2.29 (s, 3 H), 1.75 (d, *J* = 6.4 Hz, 3 H), 1.42 (d, *J* = 6.0 Hz, 3 H); <sup>13</sup>C NMR (100 MHz, CDCl<sub>3</sub>):  $\delta$  142.6, 140.4, 137.4, 134.1, 133.3, 133.1, 129.5, 128.3, 127.9, 127.7, 126.2, 123.8, 119.7, 113.1, 92.2, 88.5, 40.1, 37.3, 19.9, 19.8, 19.1, 17.9; HRMS: calcd for C<sub>20</sub>H<sub>20</sub> 260.1565, found 260.1570.

**1-Cinnamyl-2-(hept-1-ynyl)benzene (4e).**

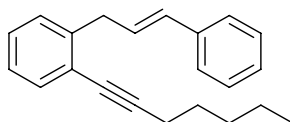

Colorless oil; <sup>1</sup>H NMR (600 MHz, CDCl<sub>3</sub>):  $\delta$  7.32 (d, *J* = 7.2 Hz, 1 H), 7.27 - 7.25 (m, 2 H), 7.20 - 7.18 (m, 2 H), 7.17 - 7.04 (m, 4 H), 6.38 (d, *J* = 15.8 Hz, 1 H), 6.32 - 6.27 (m, 1 H), 3.61 (d, *J* = 6.6 Hz, 2 H), 2.35 (t, *J* = 13.8 Hz, 2 H), 1.57 - 1.53 (m, 2 H), 1.43 - 1.34 (m, 2 H), 1.30 - 1.25 (m, 2 H), 0.83 (d, *J* = 7.2 Hz, 3 H); <sup>13</sup>C NMR (150 MHz, CDCl<sub>3</sub>):  $\delta$  141.8, 137.6, 132.2, 130.7, 128.7, 128.6, 128.4, 128.1, 127.7, 127.0, 126.1, 126.0, 123.6, 94.6, 79.1, 37.9, 31.1, 28.5, 22.2, 19.5, 13.9; HRMS: calcd for C<sub>22</sub>H<sub>24</sub> 288.1878, found 288.1879.

**1-Cinnamyl-2-(phenylethynyl)benzene (4f).**

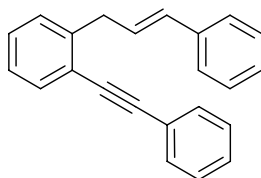

Colorless oil;  $^1\text{H}$  NMR (400 MHz,  $\text{CDCl}_3$ ):  $\delta$  7.41 - 7.22 (m, 14 H), 6.56 – 6.39 (m, 2 H), 3.80 (d,  $J$  = 6.6 Hz, 2 H);  $^{13}\text{C}$  NMR (100 MHz,  $\text{CDCl}_3$ ):  $\delta$  139.3, 137.4, 136.6, 132.1, 131.0, 130.0, 129.7, 128.6, 128.5, 127.6, 127.1, 126.1, 126.7, 125.7, 92.9, 79.1, 36.6; HRMS: calcd for  $\text{C}_{23}\text{H}_{18}$  294.1409, found 294.1413.

**1-Allyl-2-(phenylethynyl)benzene (4g).**

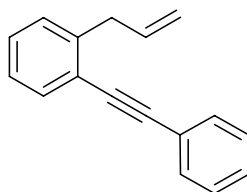

Colorless oil;  $^1\text{H}$  NMR (400 MHz,  $\text{CDCl}_3$ ):  $\delta$  7.60 – 7.56 (m, 3 H), 7.41 - 7.27 (m, 6 H), 6.19 – 6.02 (m, 1 H), 5.21 - 5.07 (m, 2 H), 3.70 (d,  $J$  = 6.8 Hz, 2 H);  $^{13}\text{C}$  NMR (100 MHz,  $\text{CDCl}_3$ ):  $\delta$  141.9, 136.5, 132.2, 131.5, 128.8, 128.5, 128.4, 128.3, 126.1, 123.4, 122.7, 116.0, 93.3, 88.0, 38.8; HRMS: calcd for  $\text{C}_{17}\text{H}_{14}$  218.1096, found 218.1097.

**2-((2-Allylphenyl)ethynyl)pyridine (4h).**

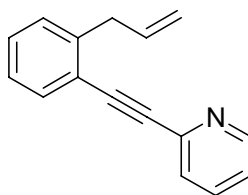

Colorless oil;  $^1\text{H}$  NMR (600 MHz,  $\text{CDCl}_3$ ):  $\delta$  8.59 (d,  $J$  = 4.8 Hz, 1 H), 7.64 – 7.62 (m, 1 H), 7.62 (d,  $J$  = 7.2 Hz, 1 H), 7.57 (d,  $J$  = 7.2 Hz, 1 H), 7.48 (d,  $J$  = 7.8 Hz, 1 H), 7.28 – 7.17 (m, 3 H), 6.09 – 6.00 (m, 1 H), 5.12 - 5.06 (m, 2 H), 3.70 (d,  $J$  = 6.6 Hz, 2 H);  $^{13}\text{C}$  NMR (150 MHz,  $\text{CDCl}_3$ ):  $\delta$  150.0, 143.5, 142.5, 136.3, 136.1, 132.7, 129.2, 128.8, 127.1, 126.1, 122.6, 121.6, 116.2, 92.4, 87.8, 38.7; HRMS: calcd for  $\text{C}_{16}\text{H}_{13}\text{N}$  219.1048, found 219.1049.

**1-Allyl-2-(3-methoxyprop-1-ynyl)benzene (4i).**

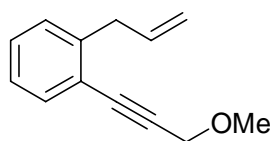

Colorless oil;  $^1\text{H}$  NMR (600 MHz,  $\text{CDCl}_3$ ):  $\delta$  7.43 (d,  $J = 6.2$  Hz, 1 H), 7.26 – 7.14 (m, 3 H), 5.99-5.95 (m, 1 H), 5.09 – 5.05 (m, 2 H), 4.35 (s, 2 H), 3.56 (d,  $J = 7.2$  Hz, 2 H), 3.45 (s, 3 H);  $^{13}\text{C}$  NMR (150 MHz,  $\text{CDCl}_3$ ):  $\delta$  142.0, 136.4, 132.4, 128.6, 128.2, 126.0, 122.1, 116.0, 88.8, 84.9, 60.4, 57.7, 38.6; HRMS: calcd for  $\text{C}_{13}\text{H}_{14}\text{O}$  186.1045, found 186.1047.

**Methyl 6-(2-allylphenyl)hex-5-ynoate (4j).**

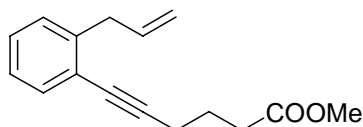

Colorless oil;  $^1\text{H}$  NMR (400 MHz,  $\text{CDCl}_3$ ):  $\delta$  7.37 (d,  $J = 4.8$  Hz, 1 H), 7.26 – 7.14 (m, 3 H), 6.01-5.97 (m, 1 H), 5.07 – 5.00 (m, 2 H), 3.67 (s, 3 H), 3.51 (d,  $J = 6.4$  Hz, 2 H), 2.51 (t,  $J = 7.2$  Hz, 4 H), 1.96 – 1.89 (m, 2 H);  $^{13}\text{C}$  NMR (100 MHz,  $\text{CDCl}_3$ ):  $\delta$  173.9, 141.7, 136.6, 131.5, 128.6, 127.8, 127.6, 125.9, 115.7, 92.7, 79.9, 51.4, 38.6, 32.8, 24.0, 19.0; HRMS: calcd for  $\text{C}_{16}\text{H}_{18}\text{O}_2$  242.1307, found 242.1310.

**1-Allyl-2-(3,3-dimethylbut-1-ynyl)-4,5-dimethylbenzene (4k).**

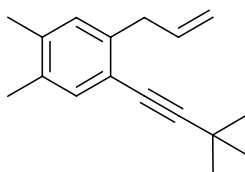

Colorless oil;  $^1\text{H}$  NMR (500 MHz,  $\text{CDCl}_3$ ):  $\delta$  7.16 (s, 1 H), 6.93 (s, 1 H), 6.03-5.95 (m, 1 H), 5.12 – 5.03 (m, 2 H), 3.47 (d,  $J = 7.0$  Hz, 2 H), 2.22 (s, 3 H), 2.18 (s, 3 H), 1.33 (s, 9 H);  $^{13}\text{C}$  NMR (125 MHz,  $\text{CDCl}_3$ ):  $\delta$  139.0, 137.2, 136.3, 134.0, 132.3, 129.8, 120.5, 115.3, 101.4, 77.6, 38.4, 31.1, 28.1, 19.6, 18.9; HRMS: calcd for  $\text{C}_{17}\text{H}_{22}$  226.1722, found 226.1723.

**3-(2-Allylphenyl)prop-2-ynyl acrylate (4l).**

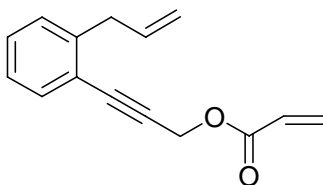

Colorless oil;  $^1\text{H}$  NMR (400 MHz,  $\text{CDCl}_3$ ):  $\delta$  7.41 (d,  $J$  = 6.8 Hz, 1 H), 7.29 – 7.25 (m, 1 H), 7.20 – 7.16 (m, 2 H), 6.50 (d,  $J$  = 17.2 Hz, 1 H), 6.18 (dd,  $J$  = 17.2, 10.4 Hz, 1 H), 6.00 – 5.96 (m, 1 H), 5.94 (d,  $J$  = 7.2 Hz, 1 H), 5.15 – 4.99 (m, 2 H), 5.01 (s, 2 H), 3.57 (d,  $J$  = 6.4 Hz, 2 H);  $^{13}\text{C}$  NMR (150 MHz,  $\text{CDCl}_3$ ):  $\delta$  165.4, 142.4, 136.3, 132.5, 131.8, 128.9, 128.2, 127.7, 125.9, 121.5, 116.0, 86.5, 85.1, 52.9, 38.6; HRMS: calcd for  $\text{C}_{15}\text{H}_{14}\text{O}_2$  226.0994, found 226.0995.

**Allyl 6-(2-allylphenyl)hex-5-ynoate (4m).**

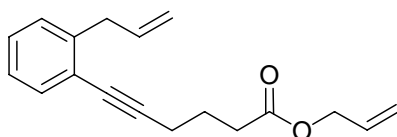

Colorless oil;  $^1\text{H}$  NMR (600 MHz,  $\text{CDCl}_3$ ):  $\delta$  7.36 (d,  $J$  = 6.6 Hz, 1 H), 7.26 – 7.12 (m, 3 H), 5.99 – 5.89 (m, 2 H), 5.32 – 5.21 (m, 2 H), 5.06 – 5.03 (m, 2 H), 4.58 (d,  $J$  = 6.6 Hz, 2 H), 3.54 (d,  $J$  = 7.2 Hz, 2 H), 2.55 – 2.47 (m, 4 H), 1.95 – 1.92 (m, 2 H);  $^{13}\text{C}$  NMR (150 MHz,  $\text{CDCl}_3$ ):  $\delta$  172.8, 141.7, 136.7, 132.2, 131.5, 128.2, 127.9, 125.9, 123.2, 118.2, 115.8, 92.7, 79.9, 65.1, 38.7, 32.8, 23.9, 19.0; HRMS: calcd for  $\text{C}_{18}\text{H}_{20}\text{O}_2$  268.1463, found 268.1465.

***N*-Allyl-*N*-(4-(2-allylphenyl)but-3-ynyl)-4-methylbenzenesulfonamide (4n).**

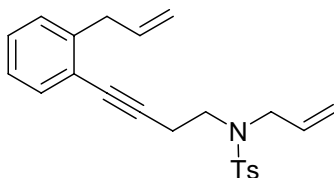

Colorless oil;  $^1\text{H}$  NMR (600MHz,  $\text{CDCl}_3$ ):  $\delta$  7.71 (d,  $J$  = 8.4 Hz, 2 H), 7.33 (d,  $J$  = 7.8 Hz, 1 H), 7.26 (d,  $J$  = 7.8 Hz, 2 H), 7.23 – 7.10 (m, 3 H), 5.99 - 5.91 (m, 1 H), 5.68 - 5.66 (m, 1 H), 5.21 - 5.15 (m, 2 H), 5.05 – 5.02 (m, 2 H), 3.87 (d,  $J$  = 6.6 Hz, 2 H), 3.48 (d,  $J$  = 6.6 Hz, 2 H), 3.36 (dd,  $J$  = 7.2, 5.2 Hz, 2 H), 2.69 (t,  $J$  = 7.2 Hz, 2 H),

2.14 (s, 3 H);  $^{13}\text{C}$  NMR (150 MHz,  $\text{CDCl}_3$ ):  $\delta$  143.3, 141.7, 136.9, 136.5, 133.0, 132.2, 129.7, 128.6, 128.1, 127.1, 125.9, 122.7, 119.2, 115.9, 90.3, 80.7, 51.2, 46.2, 38.6, 21.5, 20.3; HRMS: calcd for  $\text{C}_{23}\text{H}_{25}\text{NO}_2\text{S}$  379.1606, found 379.1609.

**4-(2-Allylphenyl)but-3-yn-1-ol (4o).**

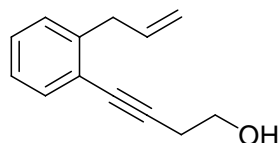

Colorless oil;  $^1\text{H}$  NMR (500 MHz,  $\text{CDCl}_3$ ):  $\delta$  7.39 (d,  $J = 7.5$  Hz, 1 H), 7.22 – 7.12 (m, 3 H), 6.01–5.93 (m, 1 H), 5.08 – 5.02 (m, 2 H), 3.80 (t,  $J = 6.0$  Hz, 2 H), 3.53 (d,  $J = 6.5$  Hz, 2 H), 2.70 (t,  $J = 7.0$  Hz, 2 H), 1.97 (bs, 1 H);  $^{13}\text{C}$  NMR (125 MHz,  $\text{CDCl}_3$ ):  $\delta$  141.7, 136.6, 132.2, 128.8, 128.2, 126.0, 122.8, 115.9, 90.2, 81.1, 61.2, 38.7, 23.9; HRMS: calcd for  $\text{C}_{13}\text{H}_{14}\text{O}$  186.1045, found 186.1050.

**5-(2-Allylphenyl)pent-4-yn-1-ol (4p).**

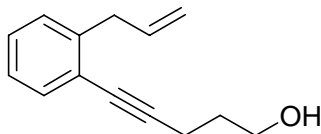

Colorless oil;  $^1\text{H}$  NMR (400 MHz,  $\text{CDCl}_3$ ):  $\delta$  7.38 (d,  $J = 7.5$  Hz, 1 H), 7.23 – 7.11 (m, 3 H), 6.02–5.96 (m, 1 H), 5.10 – 5.08 (m, 2 H), 3.78 (t,  $J = 6.0$  Hz, 2 H), 3.54 (d,  $J = 7.2$  Hz, 2 H), 2.63 (bs, 1 H), 2.55 (t,  $J = 7.2$  Hz, 2 H), 1.88 – 1.81 (m, 2 H);  $^{13}\text{C}$  NMR (100 MHz,  $\text{CDCl}_3$ ):  $\delta$  141.6, 136.6, 132.1, 128.5, 127.7, 125.8, 122.6, 115.7, 93.2, 79.5, 61.4, 38.6, 31.4, 15.9; HRMS: calcd for  $\text{C}_{14}\text{H}_{16}\text{O}$  200.1201, found 200.1202.

**1-Allyl-2-(3-methylbut-3-en-1-ynyl)benzene (4q).**

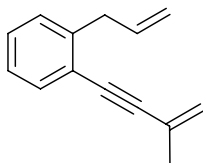

Colorless oil;  $^1\text{H}$  NMR (500 MHz,  $\text{CDCl}_3$ ):  $\delta$  7.41 (d,  $J = 7.0$  Hz, 1 H), 7.25 - 7.13 (m, 3 H), 6.00 - 5.94 (m, 1 H), 5.37 (s, 1 H), 5.28 (s, 1 H), 5.07 (t,  $J = 10.0$  Hz, 2 H), 3.55

(d,  $J = 7.5$  Hz, 2 H), 1.98 (s, 3 H);  $^{13}\text{C}$  NMR (125 MHz,  $\text{CDCl}_3$ ):  $\delta$  141.3, 136.6, 132.1, 128.7, 128.4, 126.9, 126.0, 122.7, 121.6, 115.9, 94.5, 87.0, 38.8, 23.4; HRMS: calcd for  $\text{C}_{14}\text{H}_{14}$  182.1096, found 182.1099.

**1-Allyl-2-(cyclohexenylethynyl)-4,5-dimethylbenzene (4r).**

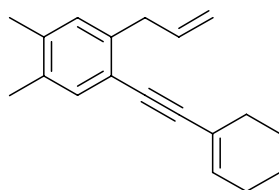

Colorless oil;  $^1\text{H}$  NMR (400 MHz,  $\text{CDCl}_3$ ):  $\delta$  7.18 (s, 1 H), 6.94 (s, 1 H), 6.19 (t,  $J = 2.4$  Hz, 1 H), 5.97 – 5.94 (m, 1 H), 5.05 – 5.02 (m, 2 H), 3.52 (d,  $J = 7.2$  Hz, 2 H), 2.14 – 2.10 (m, 4 H), 2.13 (s, 3 H), 2.11 (s, 3 H), 1.69 – 1.58 (m, 4 H);  $^{13}\text{C}$  NMR (100 MHz,  $\text{CDCl}_3$ ):  $\delta$  139.0, 137.1, 136.7, 134.3, 134.2, 132.9, 128.0, 121.0, 120.3, 115.4, 94.2, 85.6, 38.4, 29.3, 25.7, 22.4, 21.5, 19.7, 19.0; HRMS: calcd for  $\text{C}_{19}\text{H}_{22}$  250.1722, found 250.1720.

**1-Allyl-2-(hept-1-ynyl)-4,5-dimethylbenzene (4s).**

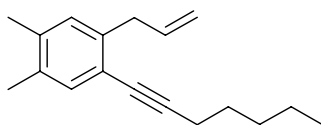

Colorless oil;  $^1\text{H}$  NMR (600 MHz,  $\text{CDCl}_3$ ):  $\delta$  7.18 (s, 1 H), 6.95 (s, 1 H), 6.01 – 5.97 (m, 1 H), 5.10 – 5.04 (m, 2 H), 3.49 (d,  $J = 6.6$  Hz, 2 H), 2.43 (t,  $J = 6.6$  Hz, 2 H), 2.22 (s, 3 H), 2.19 (s, 3 H), 1.64 – 1.59 (m, 2 H), 1.48 – 1.35 (m, 4 H), 0.9 (t,  $J = 7.8$  Hz, 3 H);  $^{13}\text{C}$  NMR (150 MHz,  $\text{CDCl}_3$ ):  $\delta$  139.0, 137.2, 136.3, 134.1, 133.1, 129.9, 120.7, 115.3, 93.1, 79.2, 38.3, 36.1, 28.6, 22.2, 19.6, 19.5, 19.0, 14.0; HRMS: calcd for  $\text{C}_{18}\text{H}_{24}$  240.1878, found 240.1881.

**5-Allyl-6-(hept-1-ynyl)-2,3-dihydro-1H-indene (4t).**

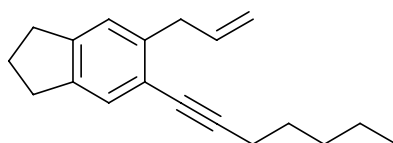

Colorless oil;  $^1\text{H}$  NMR (600 MHz,  $\text{CDCl}_3$ ):  $\delta$  7.24 (s, 1 H), 7.03 (s, 1 H), 6.00 – 5.95 (m, 1 H), 5.08 – 5.01 (m, 2 H), 3.50 (d,  $J = 6.6$ , 2 H), 2.85 – 2.81 (m, 4 H), 2.42 (t,  $J = 6.6$  Hz, 2 H), 2.03 – 2.01 (m, 2 H), 1.61 – 1.58 (m, 2 H), 1.44 – 1.34 (m, 4 H), 0.92 (t,  $J = 7.2$  Hz, 3 H);  $^{13}\text{C}$  NMR (150 MHz,  $\text{CDCl}_3$ ):  $\delta$  144.3, 141.9, 139.7, 137.4, 127.8, 124.5, 121.1, 115.3, 93.1, 79.6, 38.7, 32.8, 32.3, 31.1, 28.0, 25.4, 22.2, 19.5, 13.9; HRMS: calcd for  $\text{C}_{19}\text{H}_{24}$  252.1878, found 252.1880.

**5-(6-Allylbenzo[d][1,3]dioxol-5-yl)pent-4-yn-1-ol (4u).**

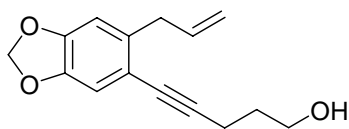

Colorless oil;  $^1\text{H}$  NMR (600 MHz,  $\text{CDCl}_3$ ):  $\delta$  6.80 (s, 1 H), 6.64 (s, 1 H), 5.93 – 5.88 (m, 1 H), 5.90 (s, 2 H), 5.05 – 5.02 (m, 2 H), 3.79 (t,  $J = 6.0$  Hz, 2 H), 3.43 (d,  $J = 7.2$  Hz, 2 H), 2.53 (t,  $J = 7.2$  Hz, 2 H), 1.86 – 1.81 (m, 2 H), 1.56 (bs, 1 H);  $^{13}\text{C}$  NMR (150 MHz,  $\text{CDCl}_3$ ):  $\delta$  147.5, 145.6, 136.8, 136.5, 115.8, 111.6, 109.0, 101.1, 91.6, 79.6, 61.8, 38.5, 31.5, 16.1; HRMS: calcd for  $\text{C}_{15}\text{H}_{16}\text{O}_3$  244.1099, found 244.1098.

**1-Allyl-2-(hept-1-ynyl)-4-methylbenzene (4v) and 2-allyl-1-(hept-1-ynyl)-4-methylbenzene (4v').**

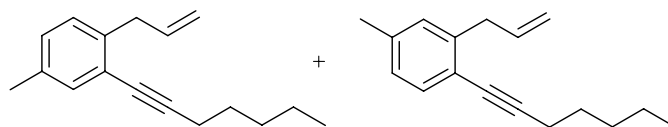

Colorless oil;  $^1\text{H}$  NMR (400 MHz,  $\text{CDCl}_3$ ):  $\delta$  7.29 – 7.21 (m, 2 H), 7.05 – 6.97 (m, 4 H), 6.07 – 5.95 (m, 2 H), 5.17 – 5.01 (m, 4 H), 3.52 (d,  $J = 6.4$  Hz, 4 H), 2.40 (t,  $J = 6.0$  Hz, 4 H), 2.23 (s, 3 H), 2.21 (s, 3 H), 1.64 – 1.62 (m, 4 H), 1.46 – 1.42 (m, 4 H), 1.39 – 1.31 (m, 4 H), 0.94 – 0.89 (m, 6 H);  $^{13}\text{C}$  NMR (100 MHz,  $\text{CDCl}_3$ ):  $\delta$  141.5, 138.7, 137.5, 137.1, 136.9, 135.4, 132.6, 131.9, 129.3, 128.5, 128.4, 126.9, 126.7, 115.5, 115.4, 93.9, 93.5, 77.5, 77.3, 38.7, 38.3, 31.1, 30.9, 28.6, 28.0, 22.2, 22.1, 21.3, 20.7, 19.5, 19.1, 14.0, 13.9; HRMS: calcd for  $\text{C}_{17}\text{H}_{22}$  226.1722, found 226.1725.

## References.

1. D. D. Perrin and W. L. F. Armarego, *In Purification of Laboratory Chemicals*, 3rd edn, Pergamon Press: New York, 1988.
2. (a) Y. Himeshima, T. Sonoda and H. Kobayashi, *Chem. Lett.* 1983, 1211; (b) D. Pena, D. Perez, E. Guitian and L. Castedo, *J. Am. Chem. Soc.*, 1999, **121**, 5827; (c) E. Yoshikawa, K. V. Radhakrishnan and Y. Yamamoto *J. Am. Chem. Soc.*, 2000, **122**, 7280.

$^1\text{H}$  and  $^{13}\text{C}$  NMR spectra of compound **4a**.

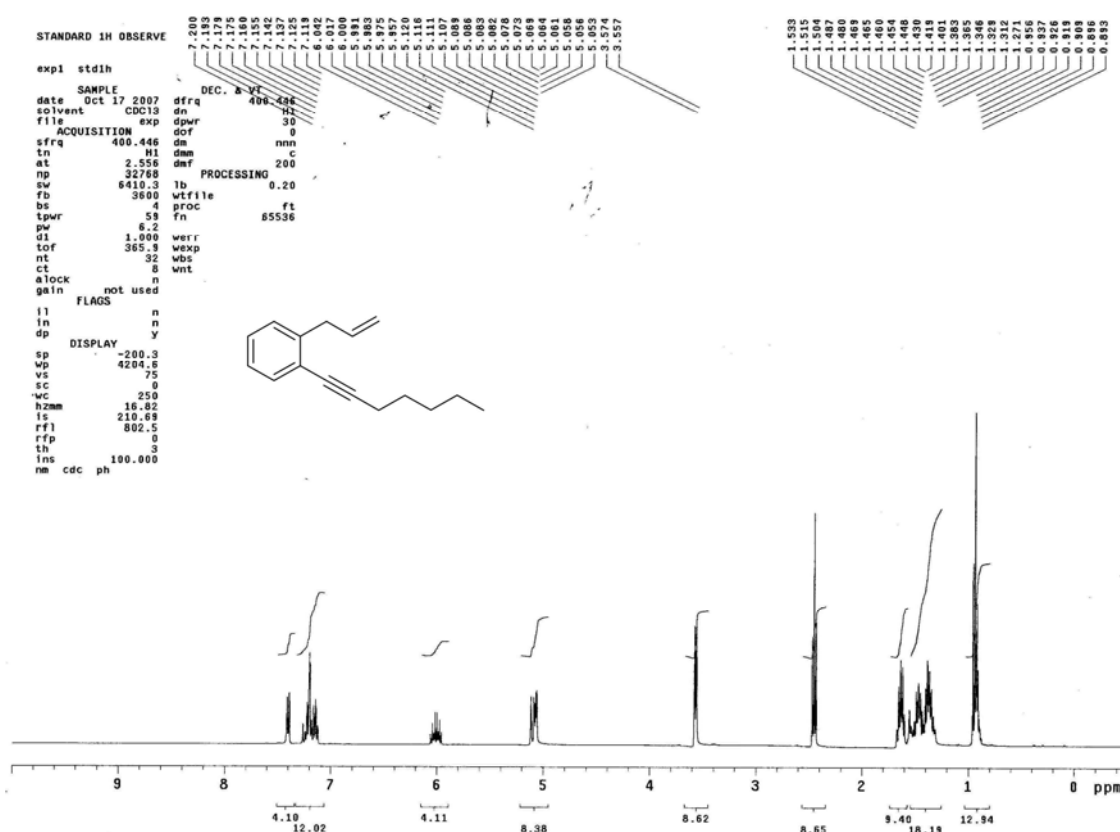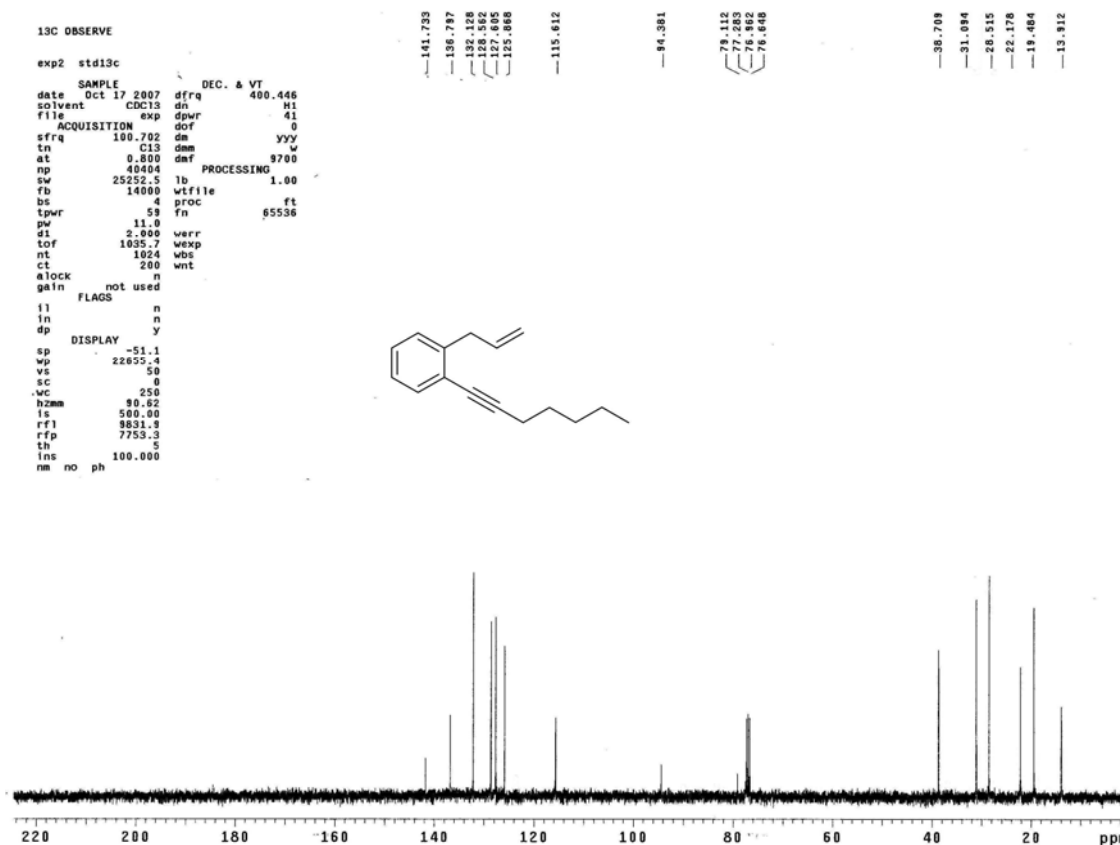

$^1\text{H}$  and  $^{13}\text{C}$  NMR spectra of compound **4b**.

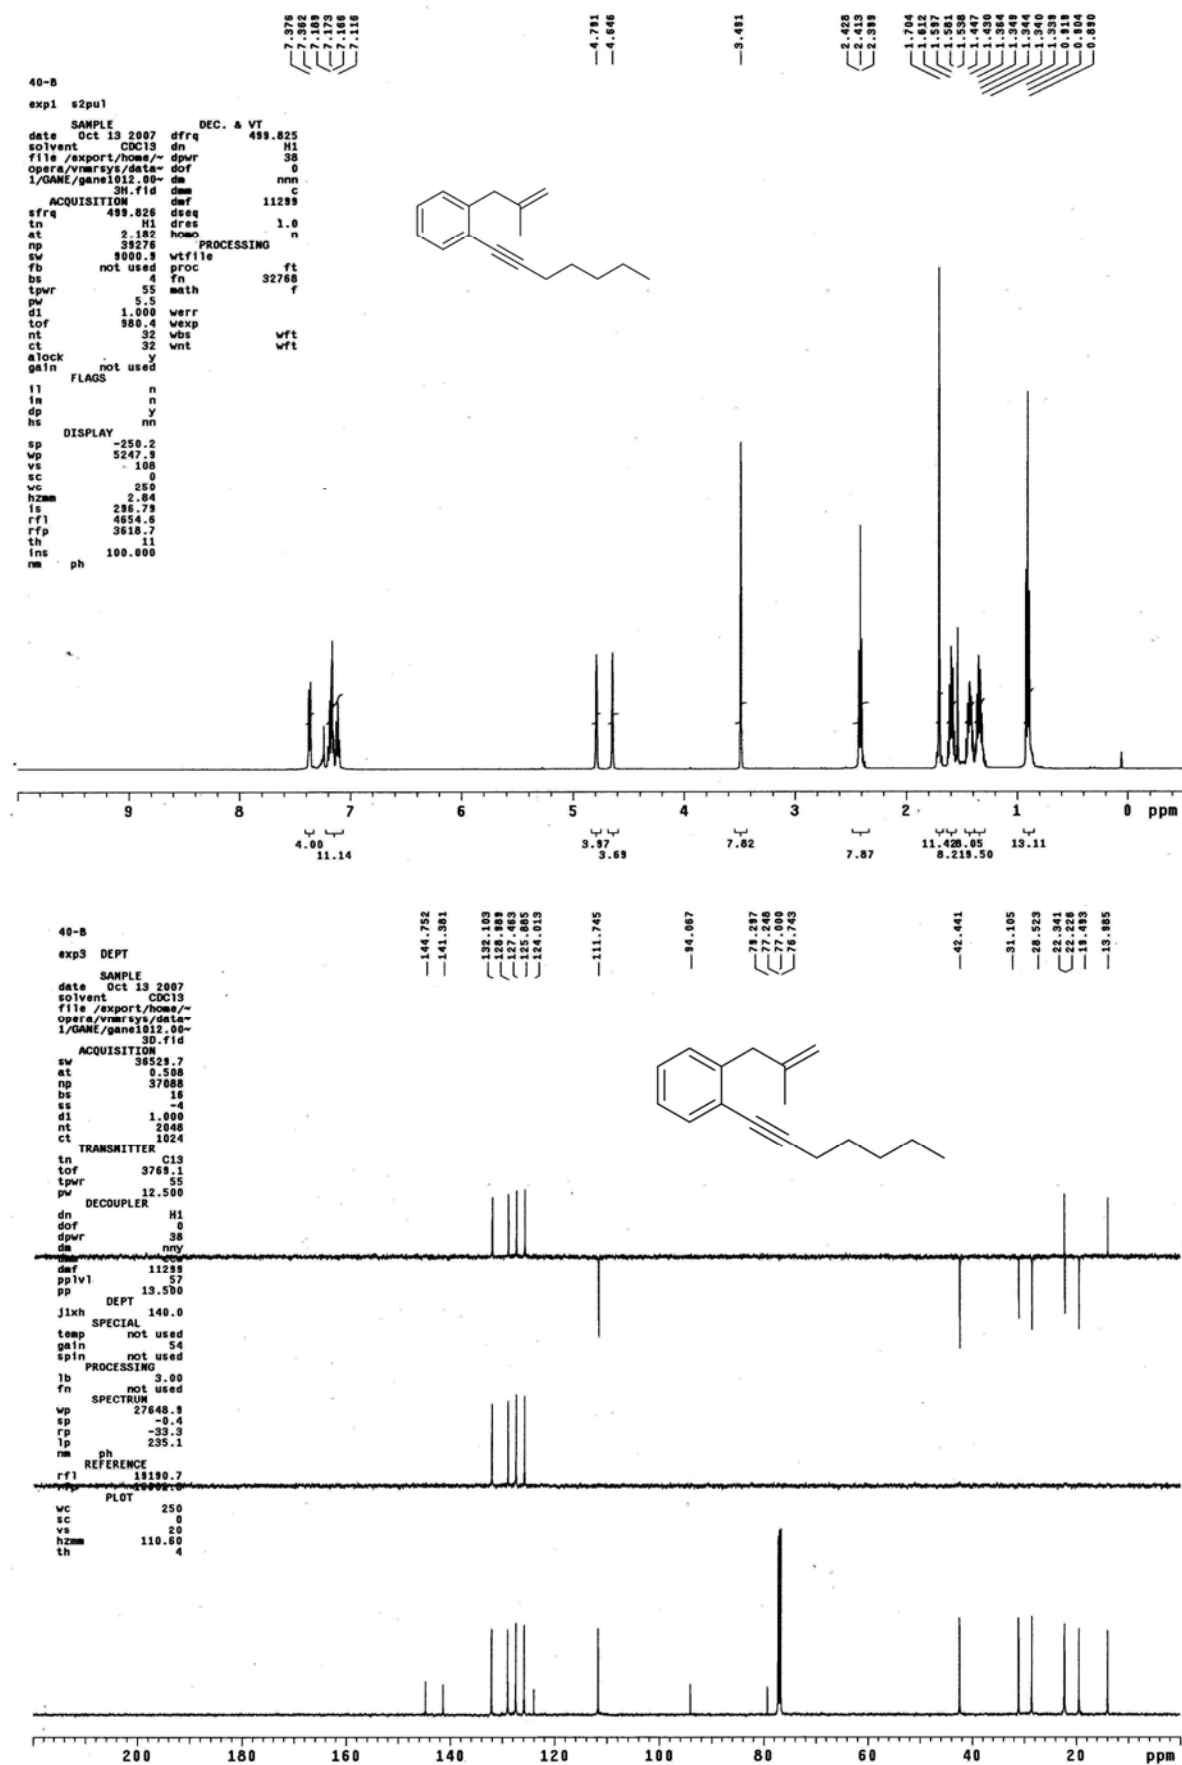

<sup>1</sup>H NMR spectrum of compounds **4c** and **4d**.

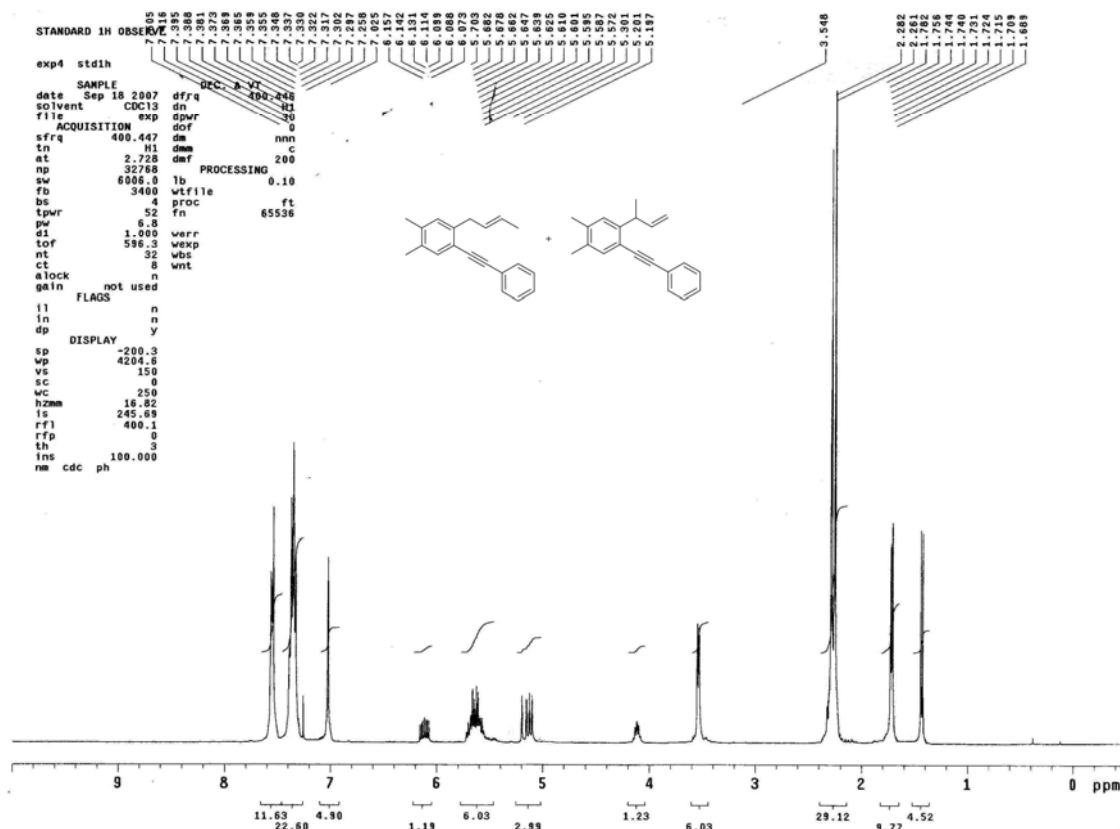

<sup>1</sup>H NMR spectrum of compound **4f**.

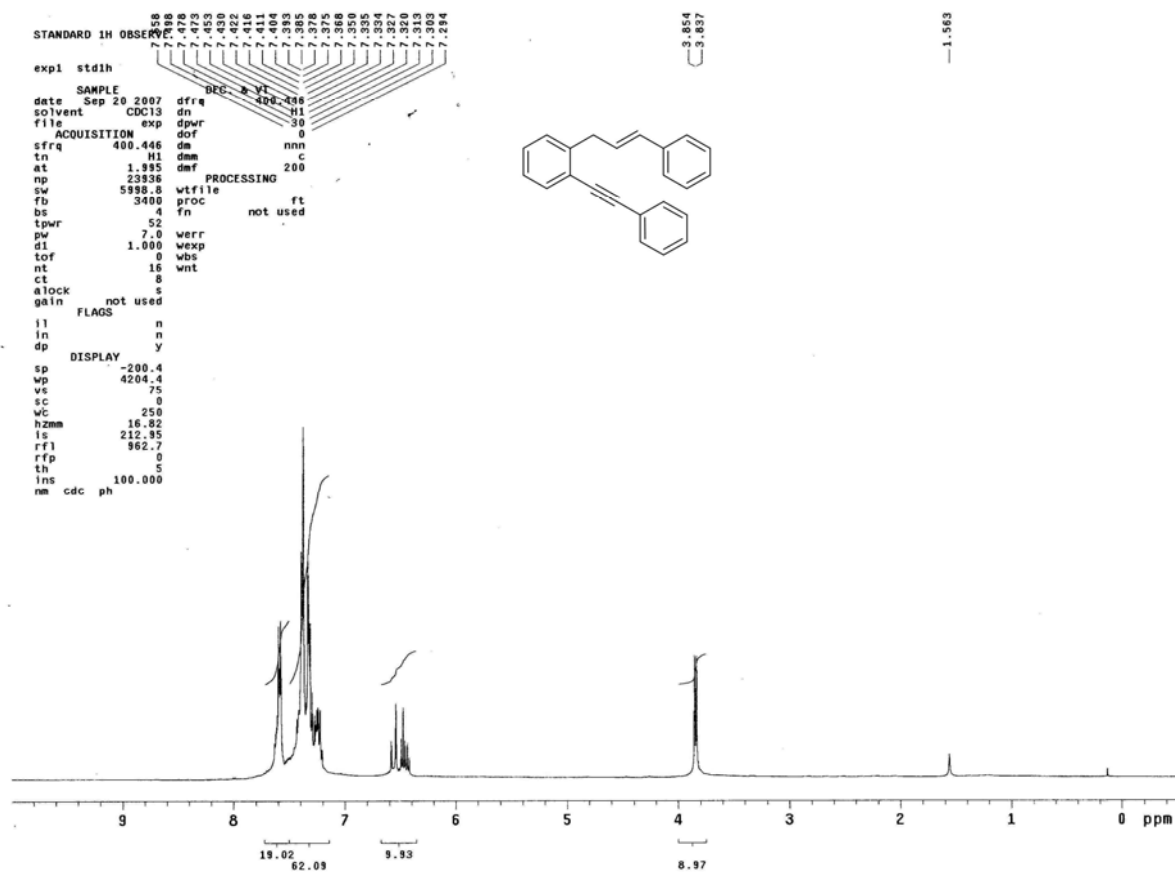

$^1\text{H}$  and  $^{13}\text{C}$  NMR spectra of compound **4e**.

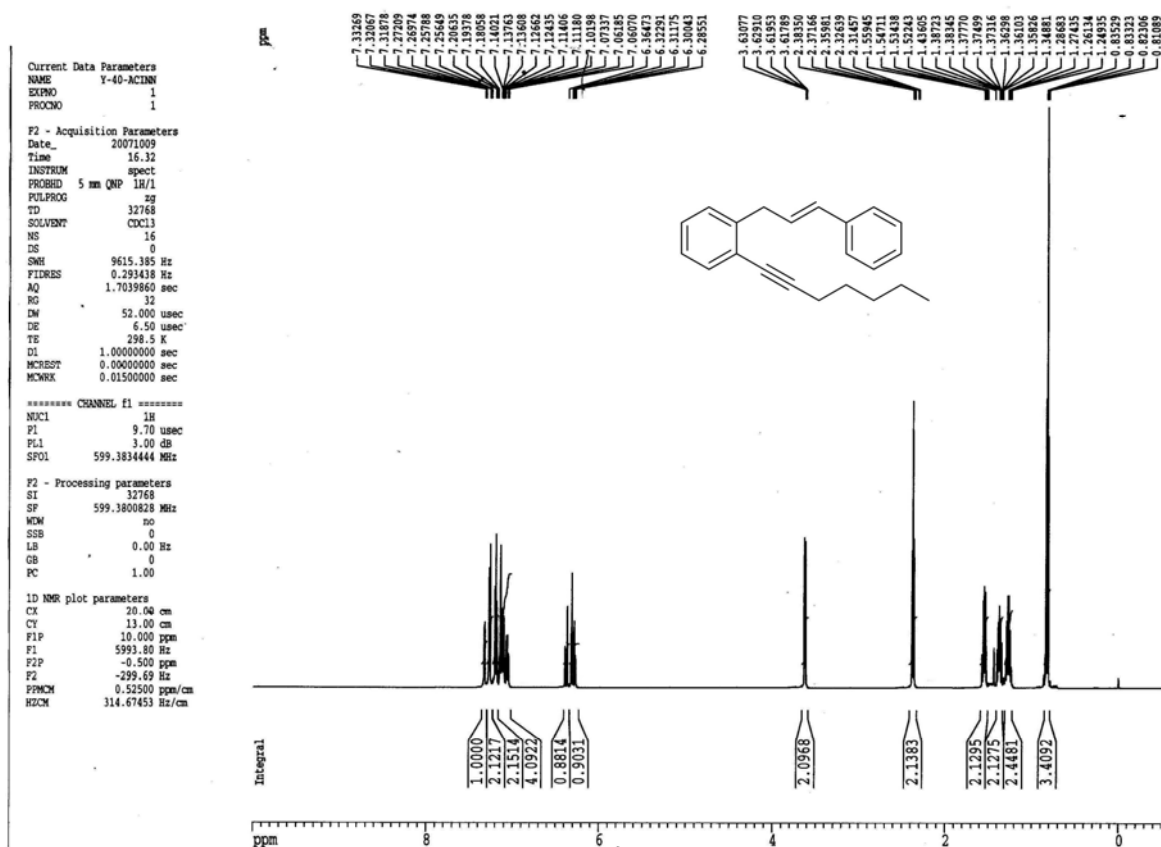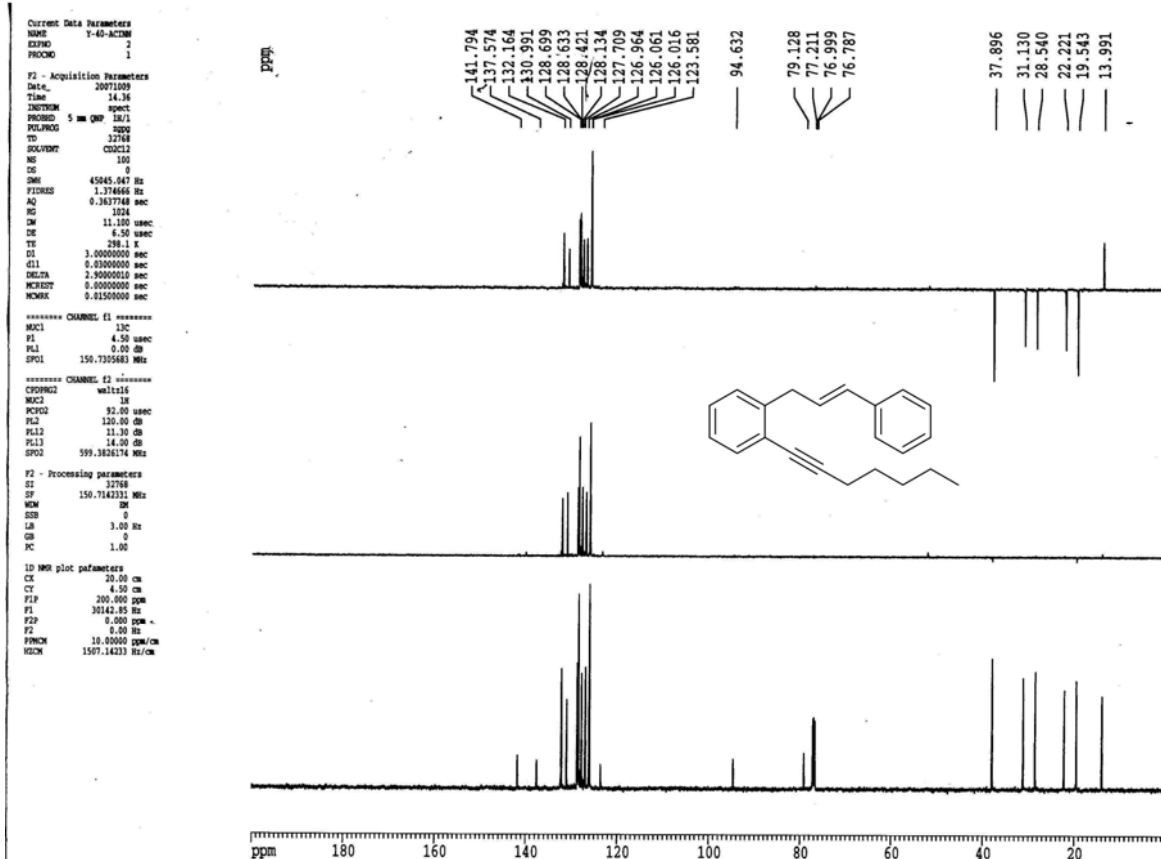

$^1\text{H}$  and  $^{13}\text{C}$  NMR spectra of compound **4g**.

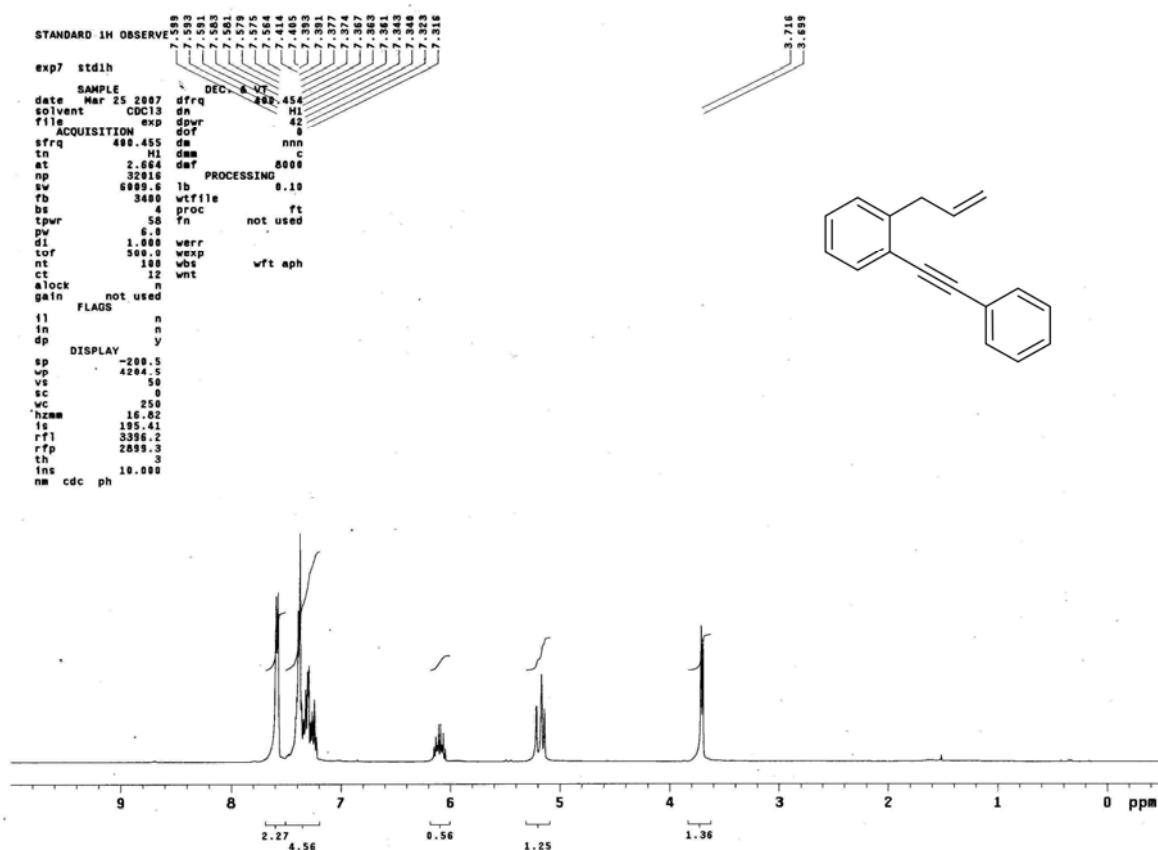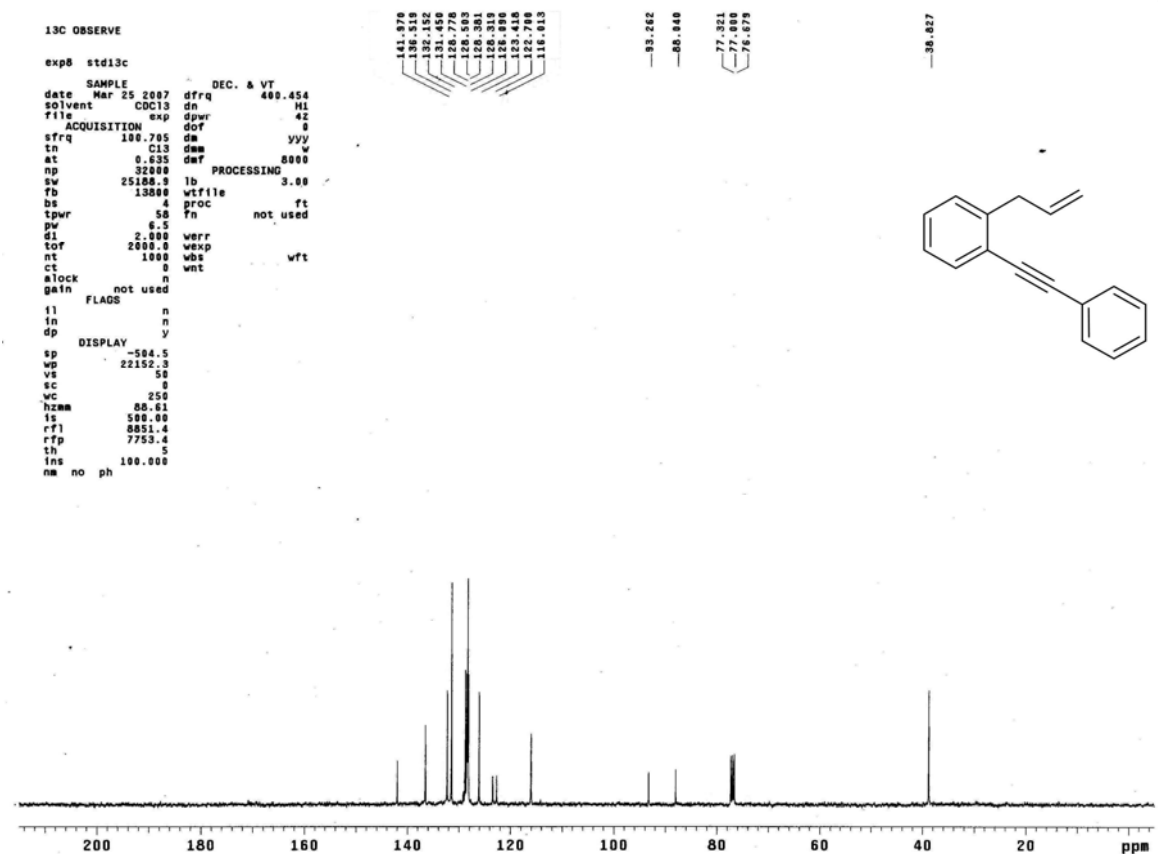

$^1\text{H}$  and  $^{13}\text{C}$  NMR spectra of compound **4h**.

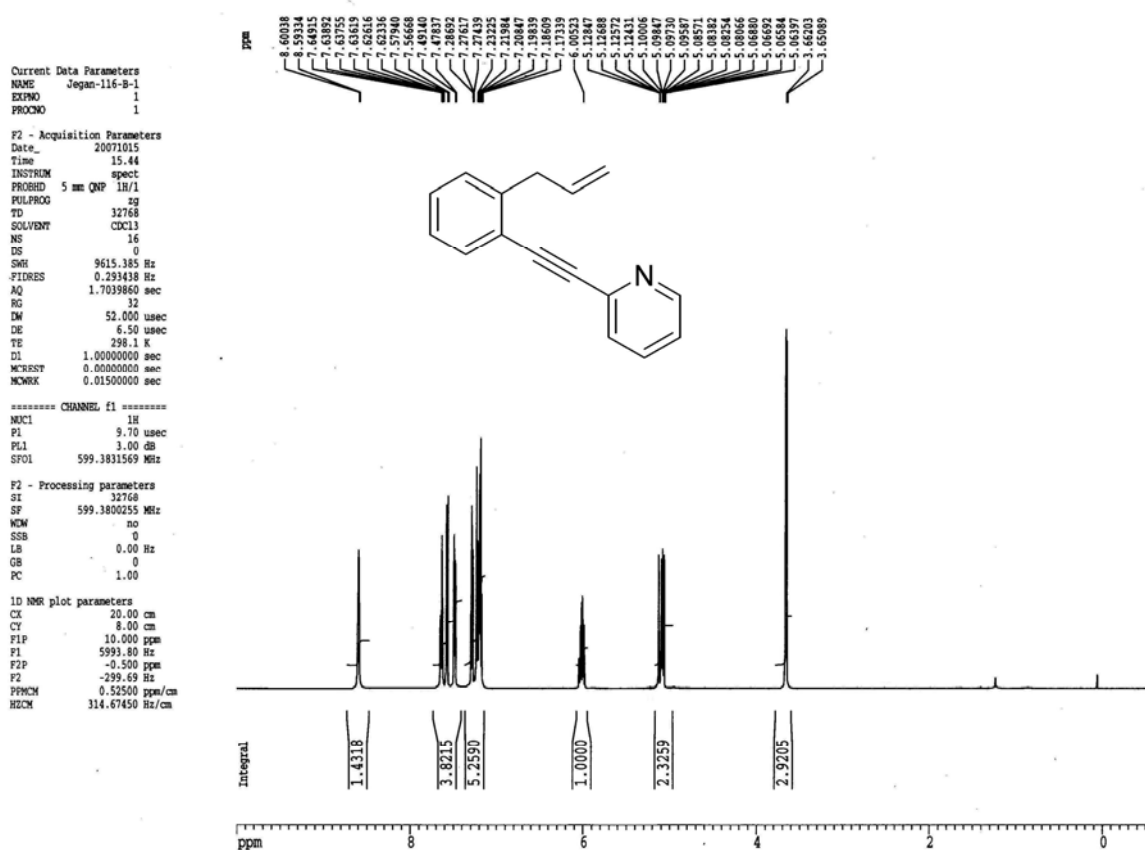

$^1\text{H}$  and  $^{13}\text{C}$  NMR spectra of compound **4i**.

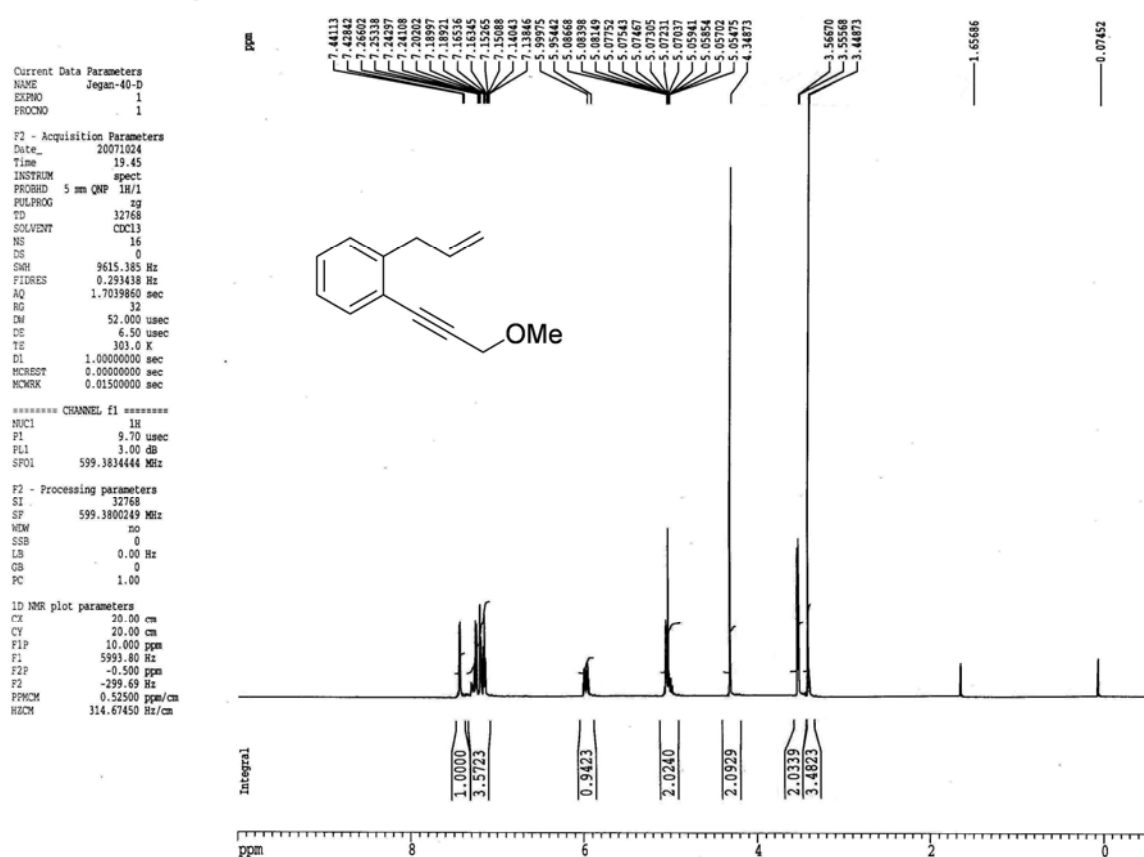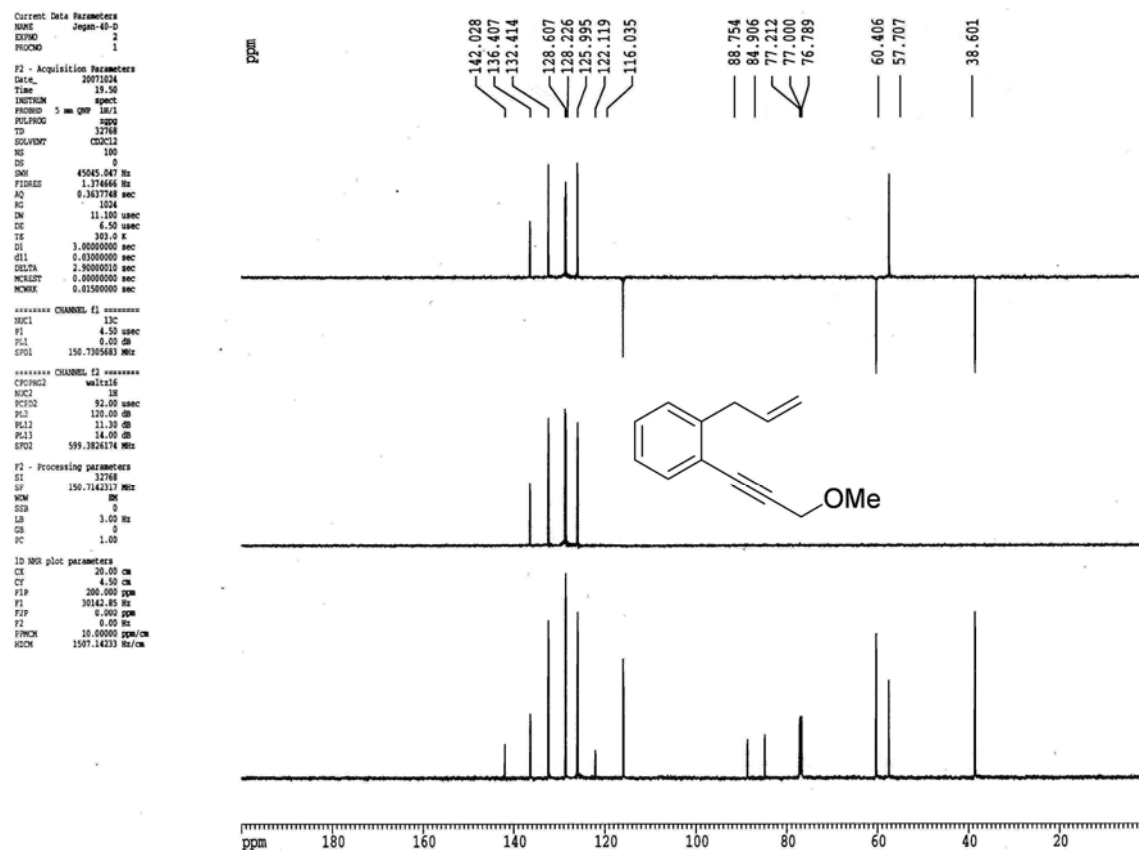

$^1\text{H}$  and  $^{13}\text{C}$  NMR spectra of compound **4j**.

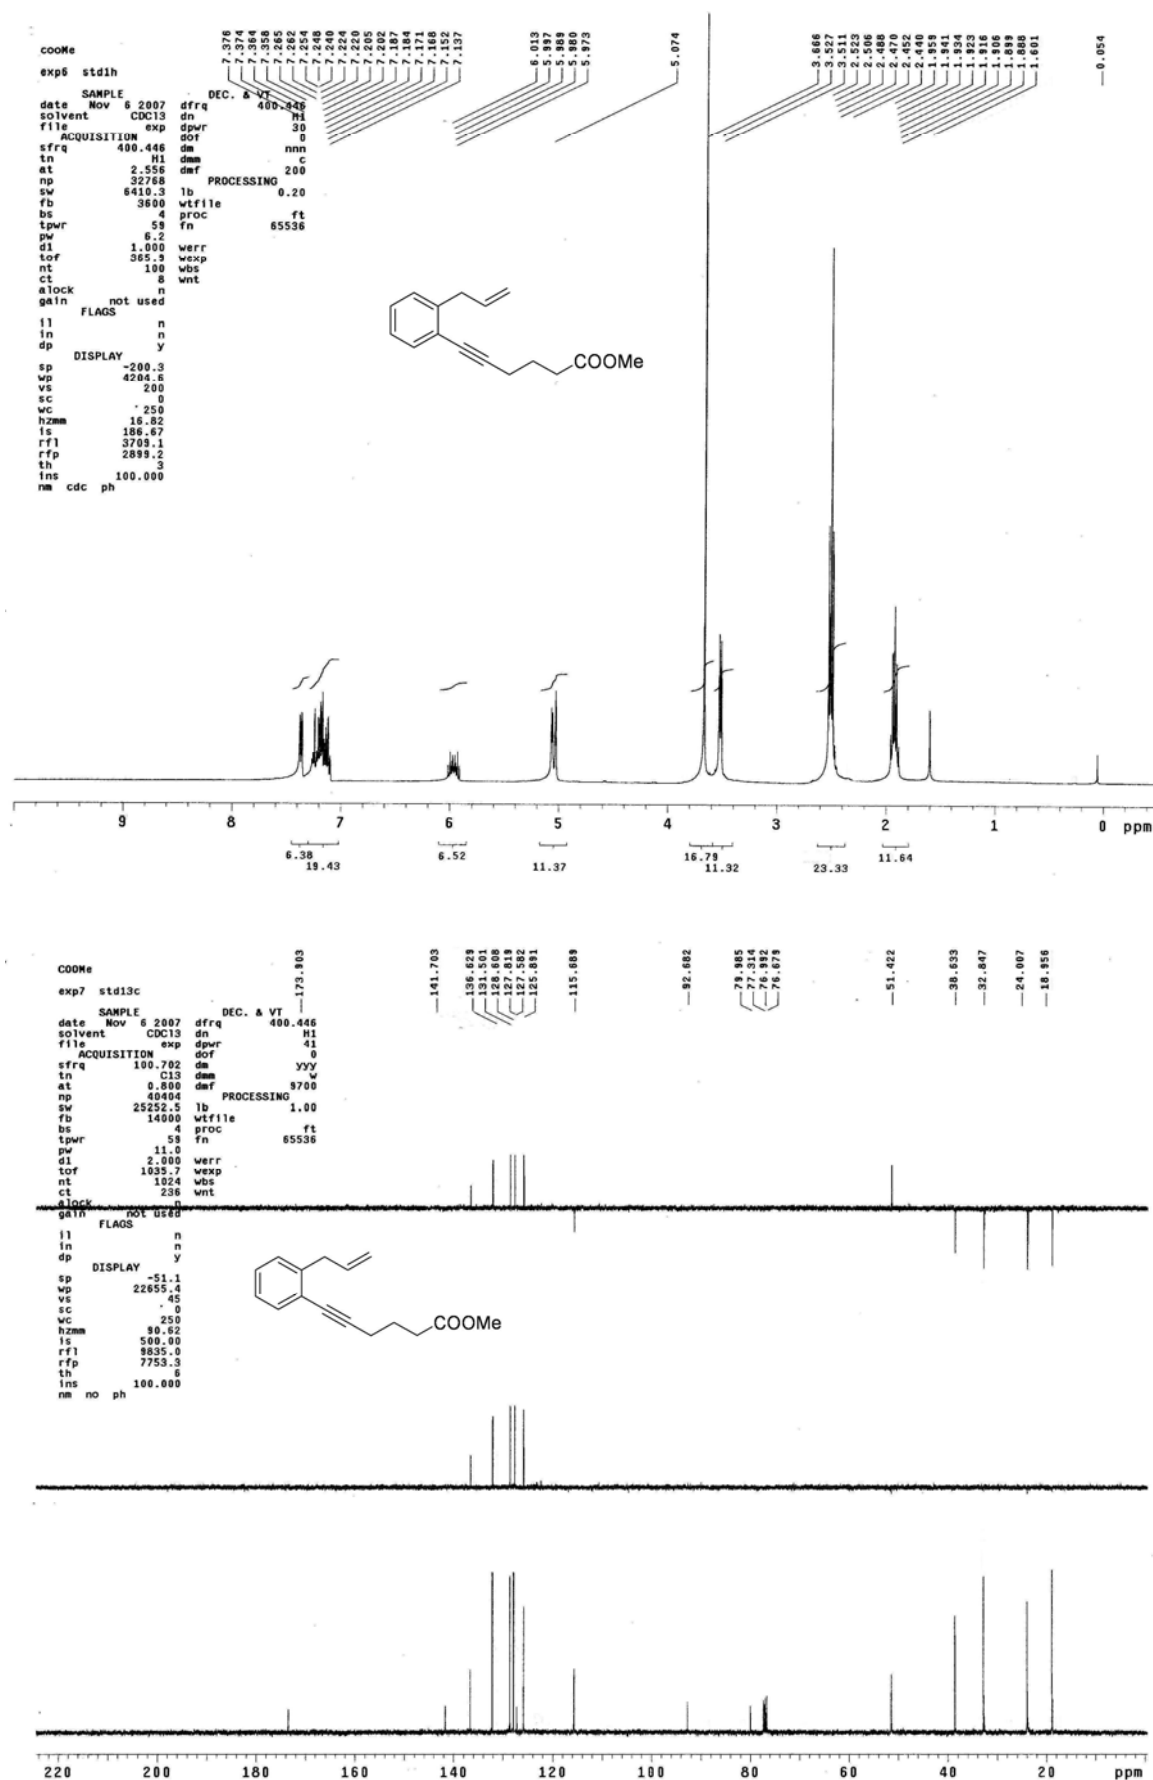

$^1\text{H}$  and  $^{13}\text{C}$  NMR spectra of compound **4k**.

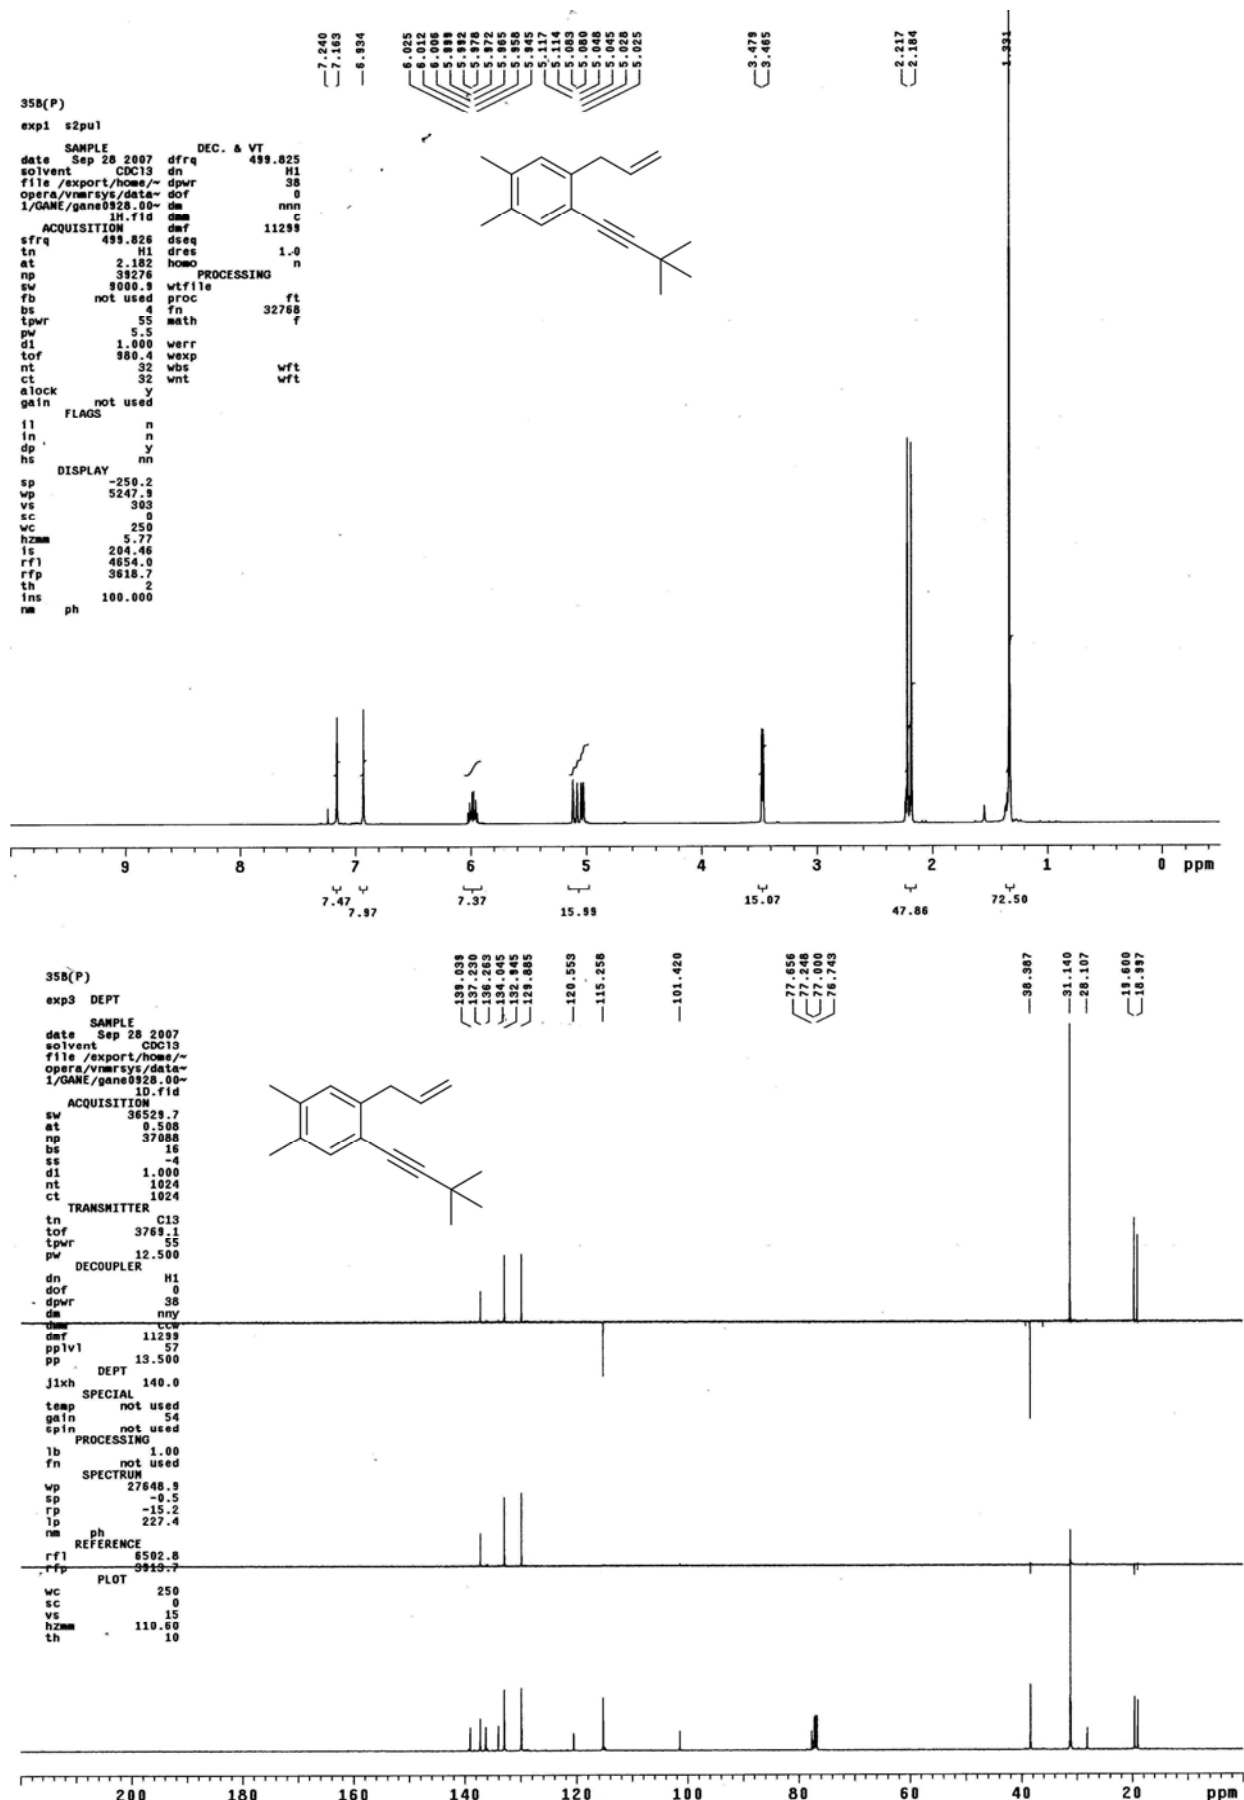

$^1\text{H}$  and  $^{13}\text{C}$  NMR spectra of compound **4l**.

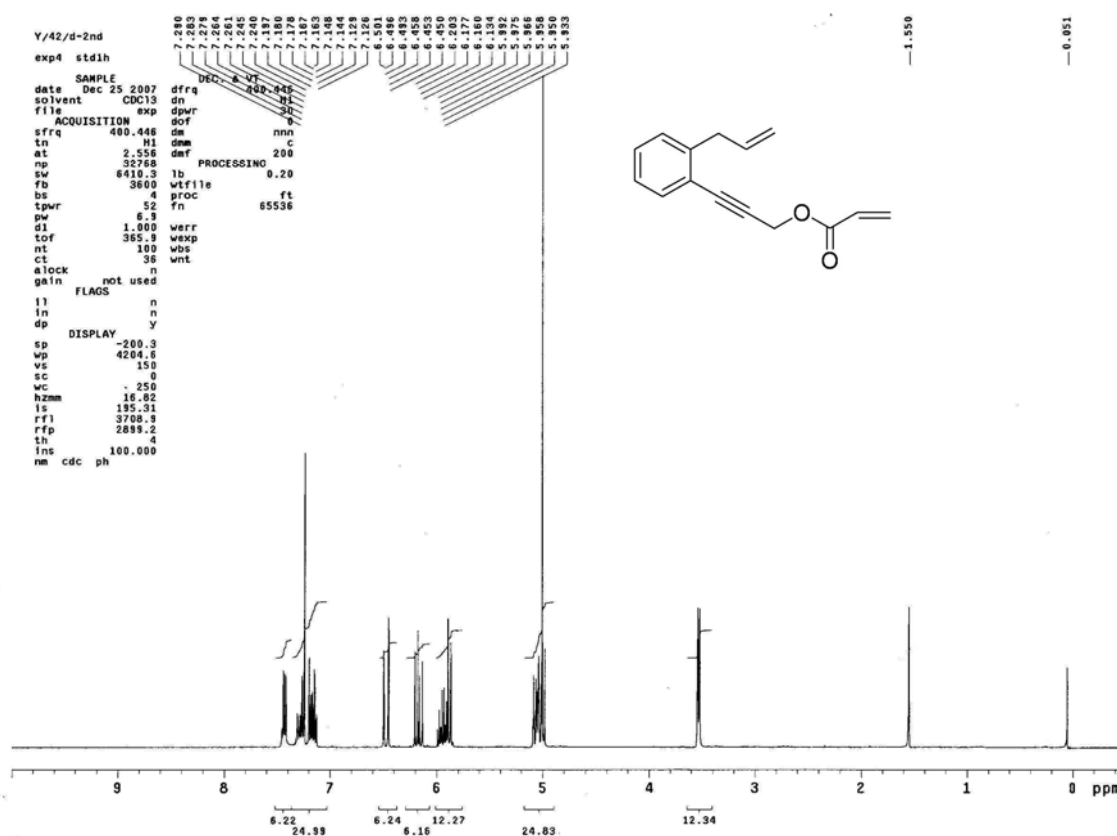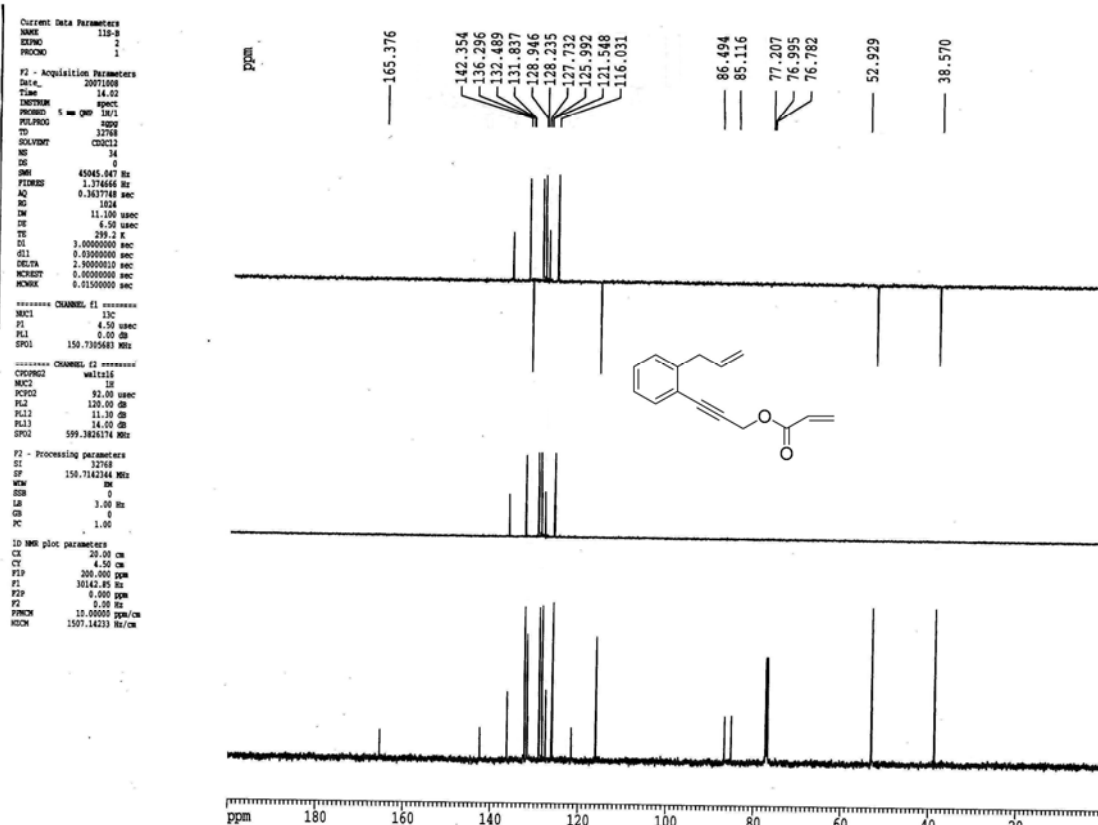

$^1\text{H}$  and  $^{13}\text{C}$  NMR spectra of compound **4m**.

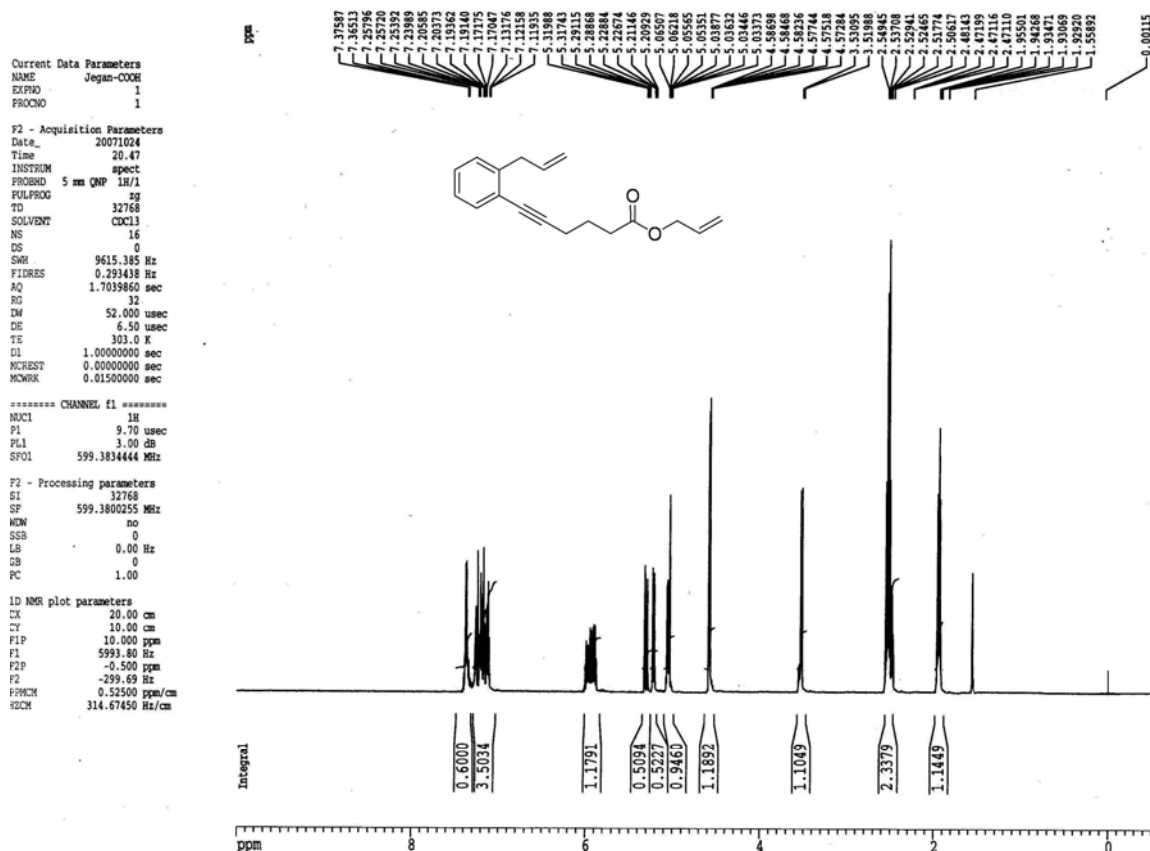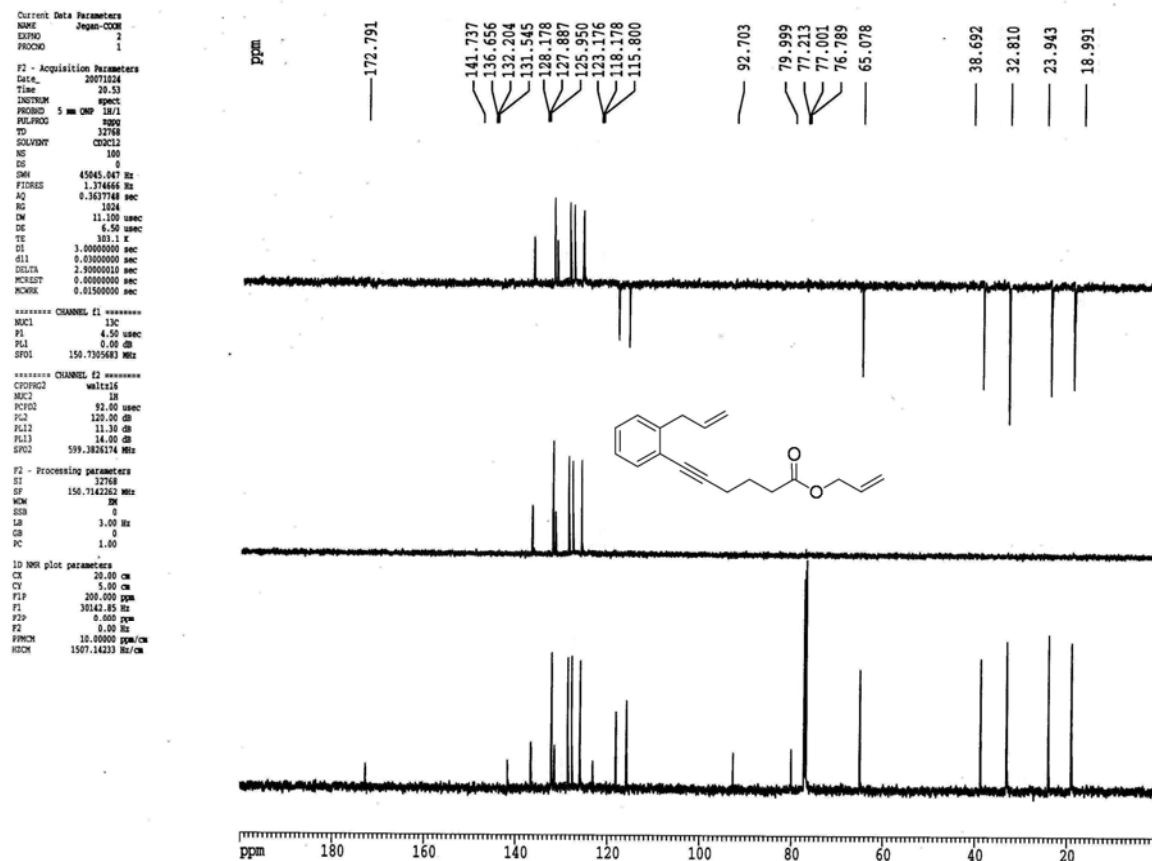

$^1\text{H}$  and  $^{13}\text{C}$  NMR spectra of compound **4n**.

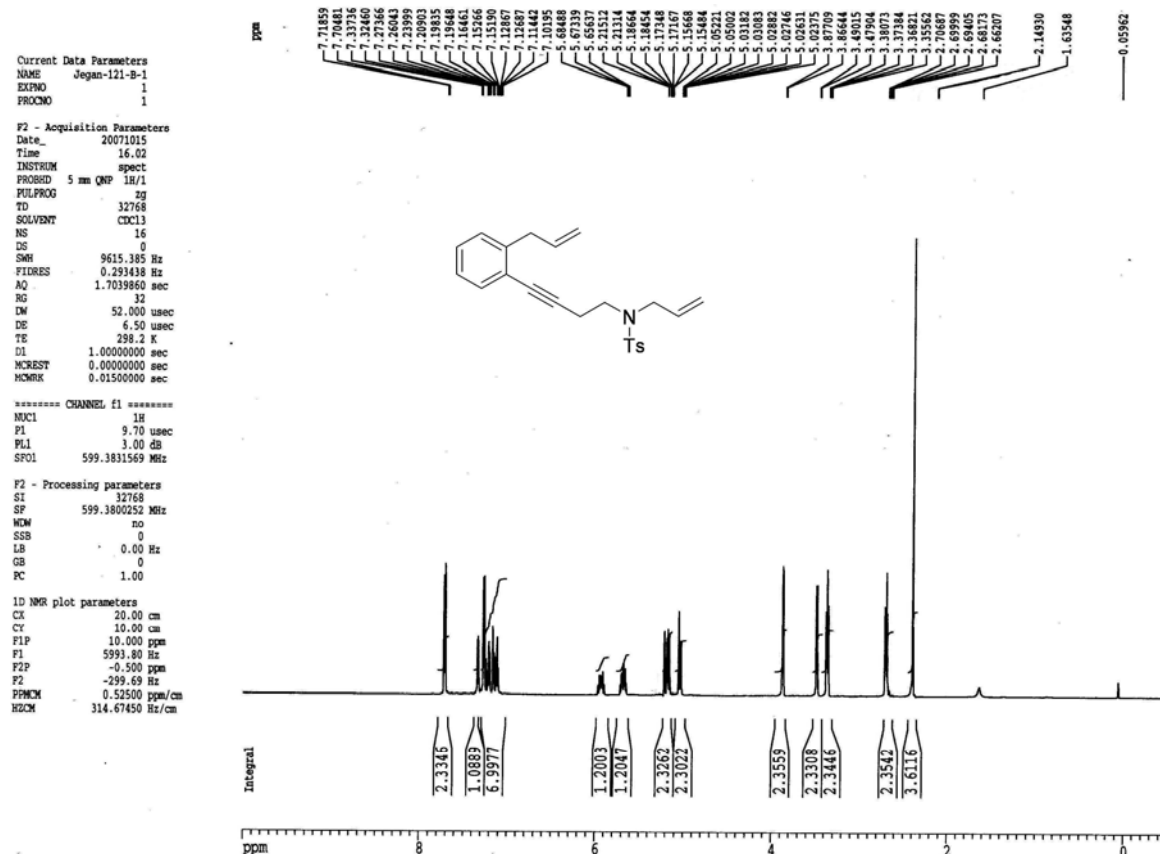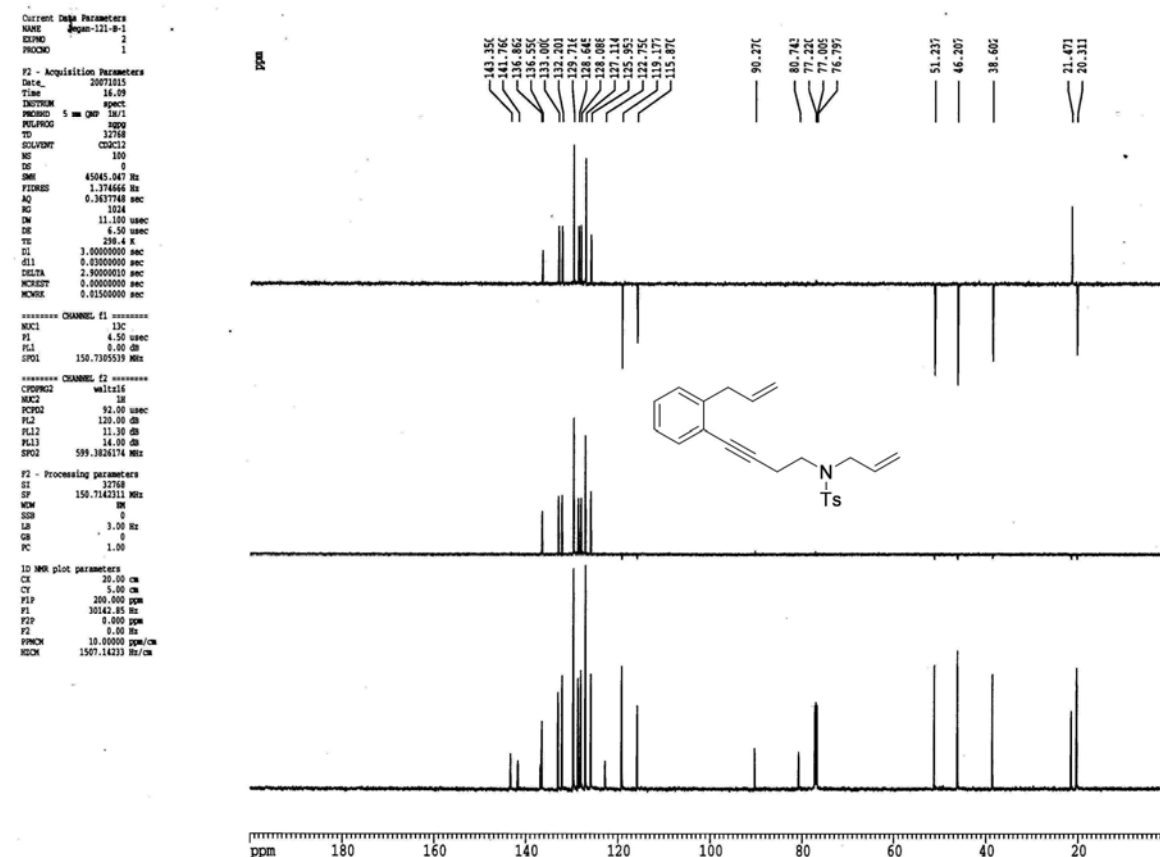

$^1\text{H}$  and  $^{13}\text{C}$  NMR spectra of compound **4o**.

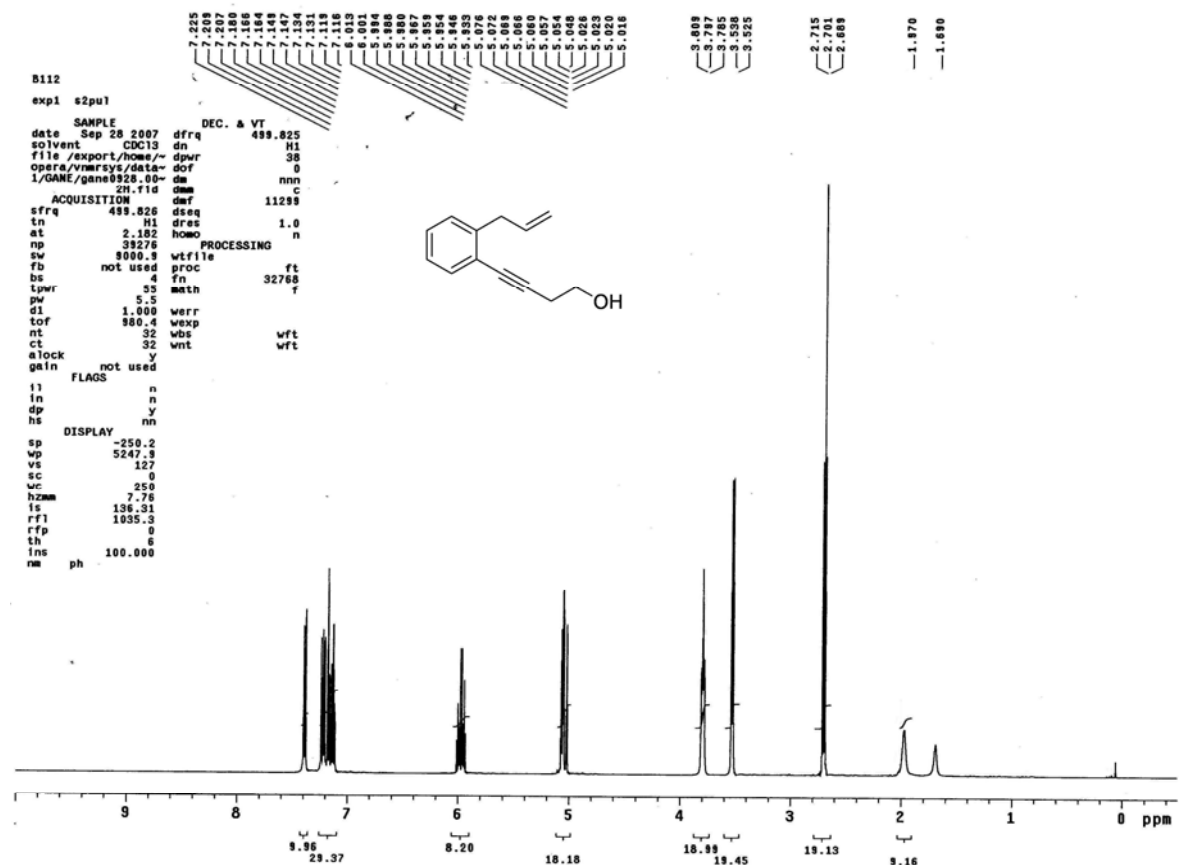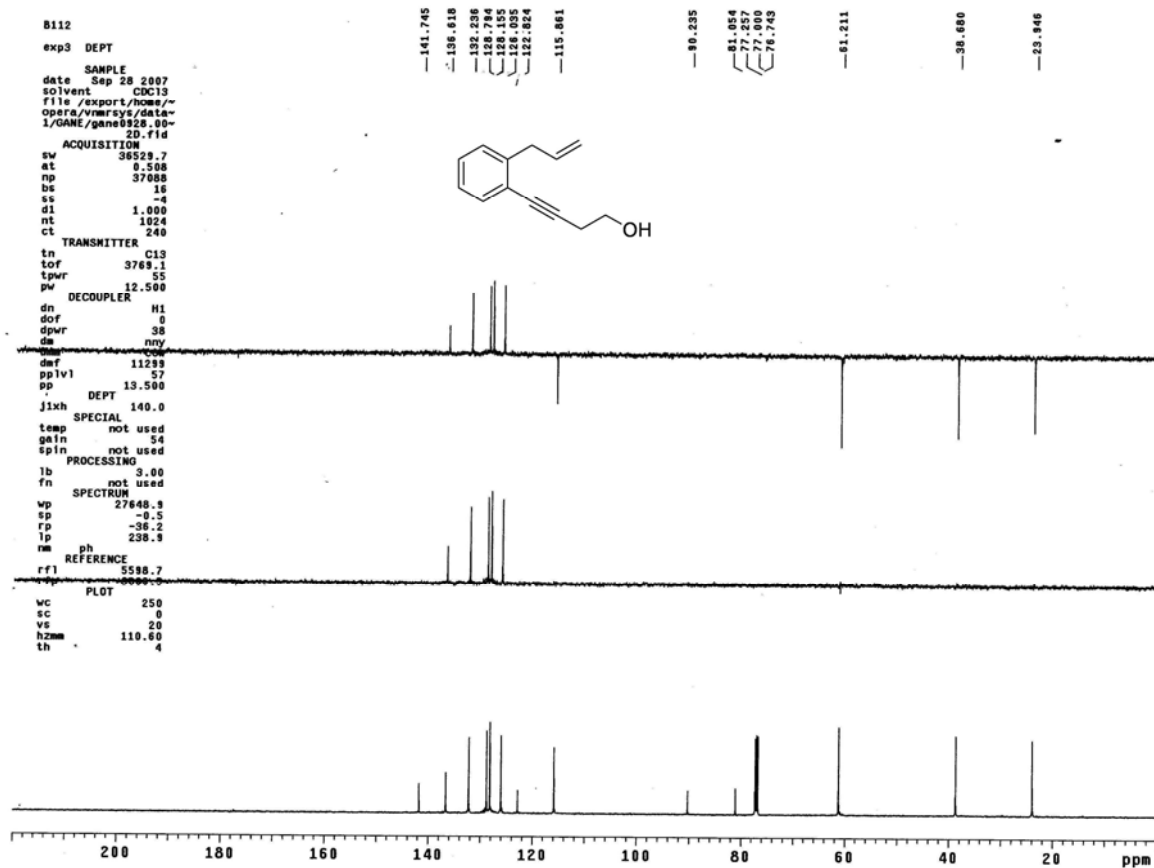

$^1\text{H}$  and  $^{13}\text{C}$  NMR spectra of compound **4p**.

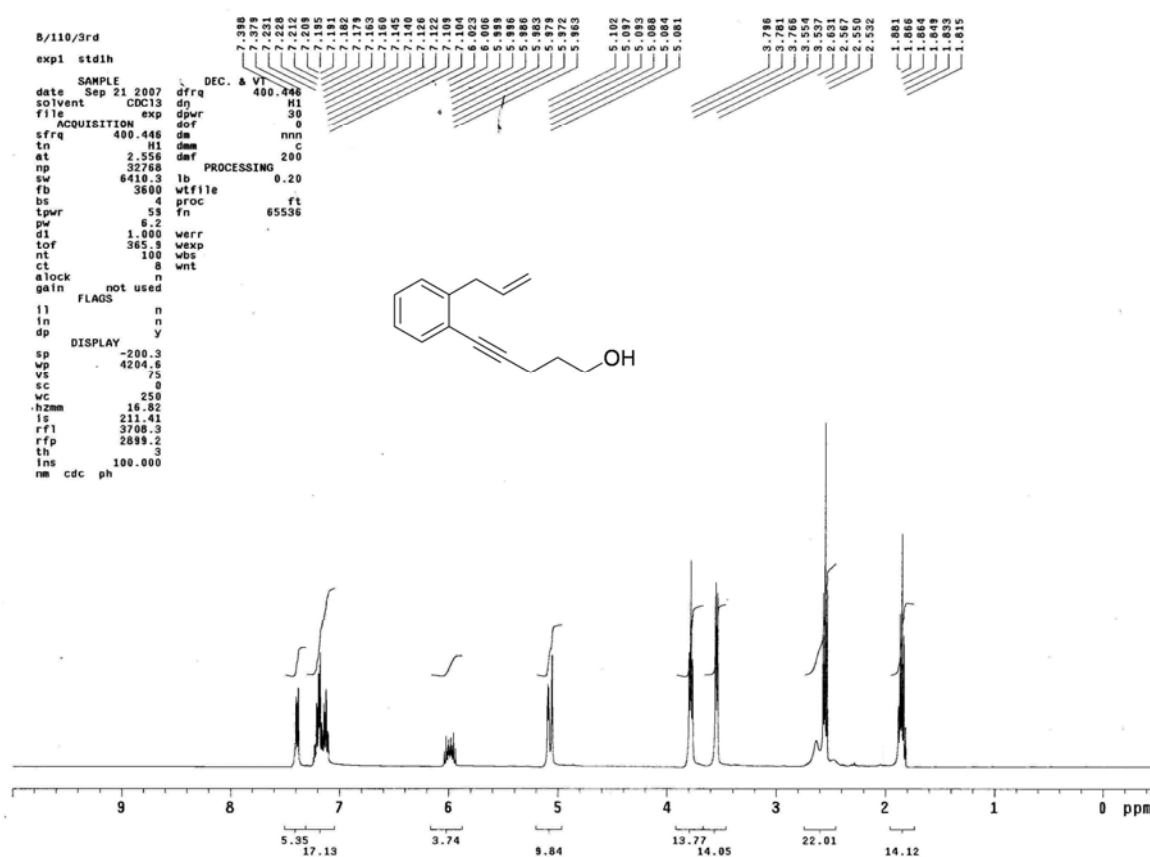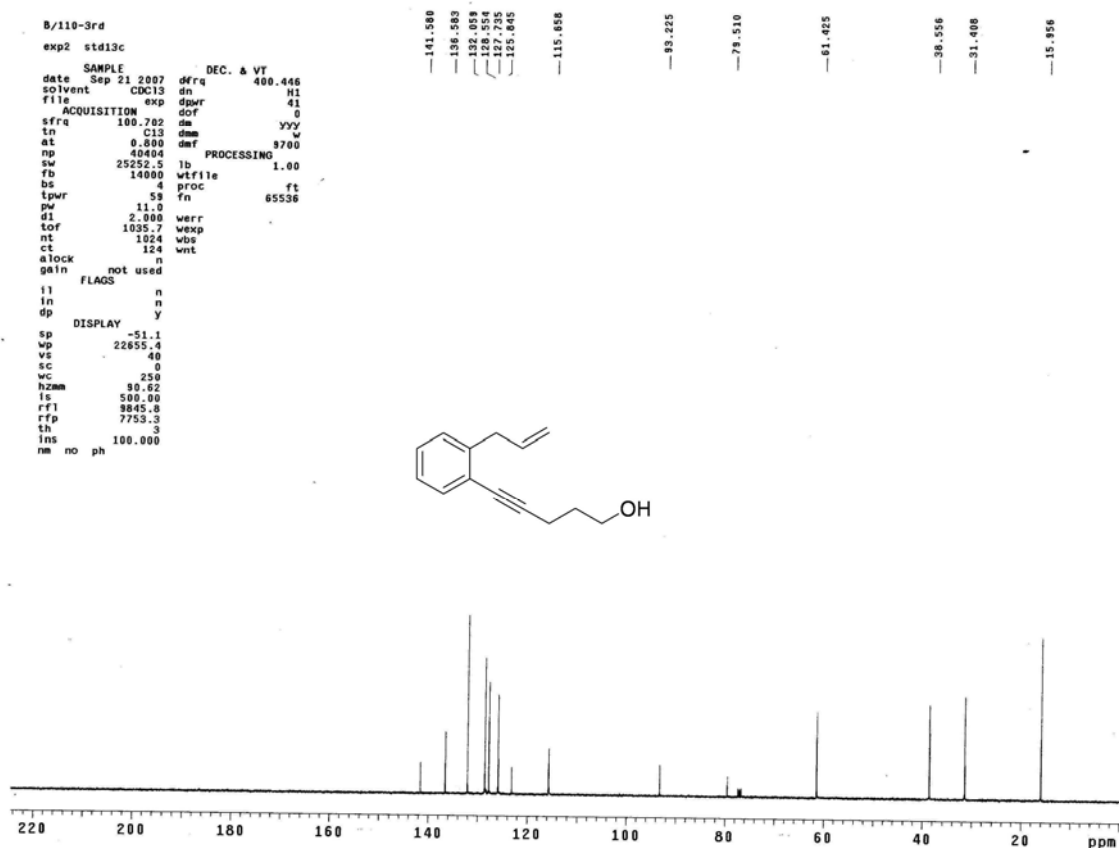

$^1\text{H}$  and  $^{13}\text{C}$  NMR spectra of compound **4q**.

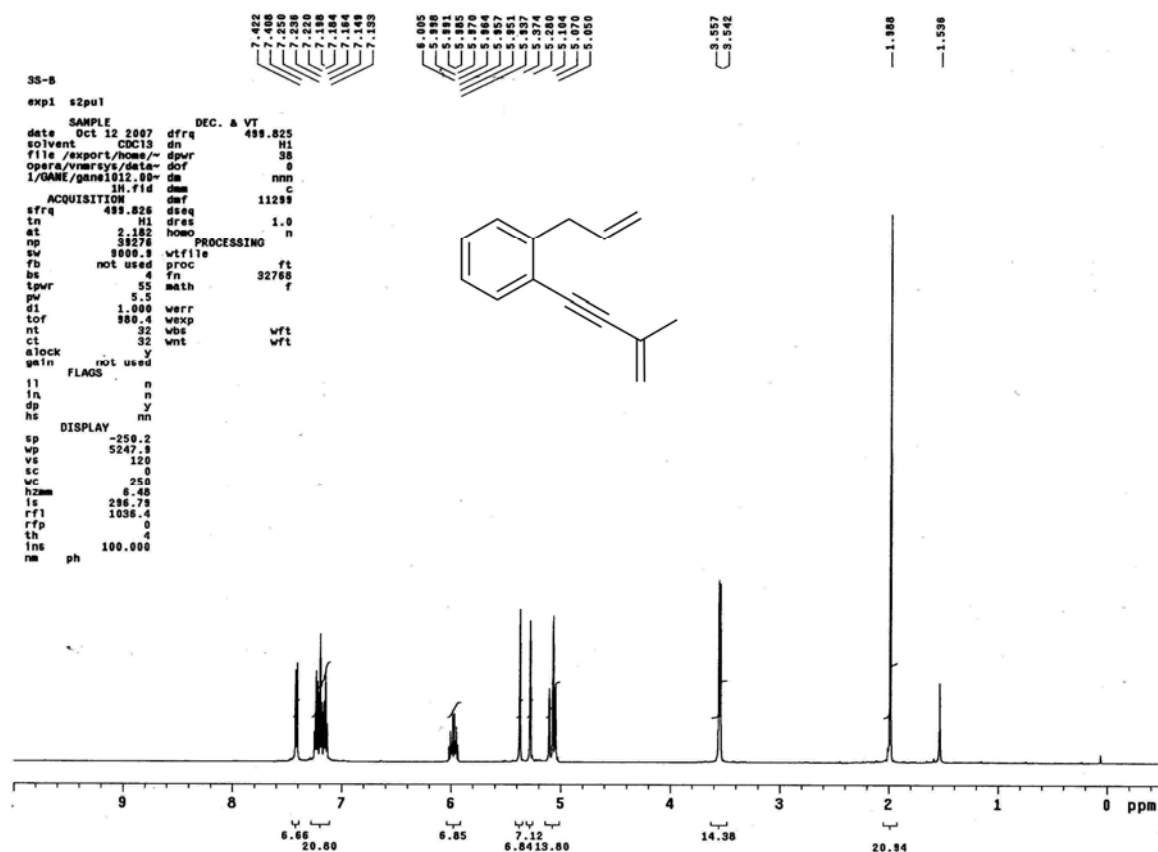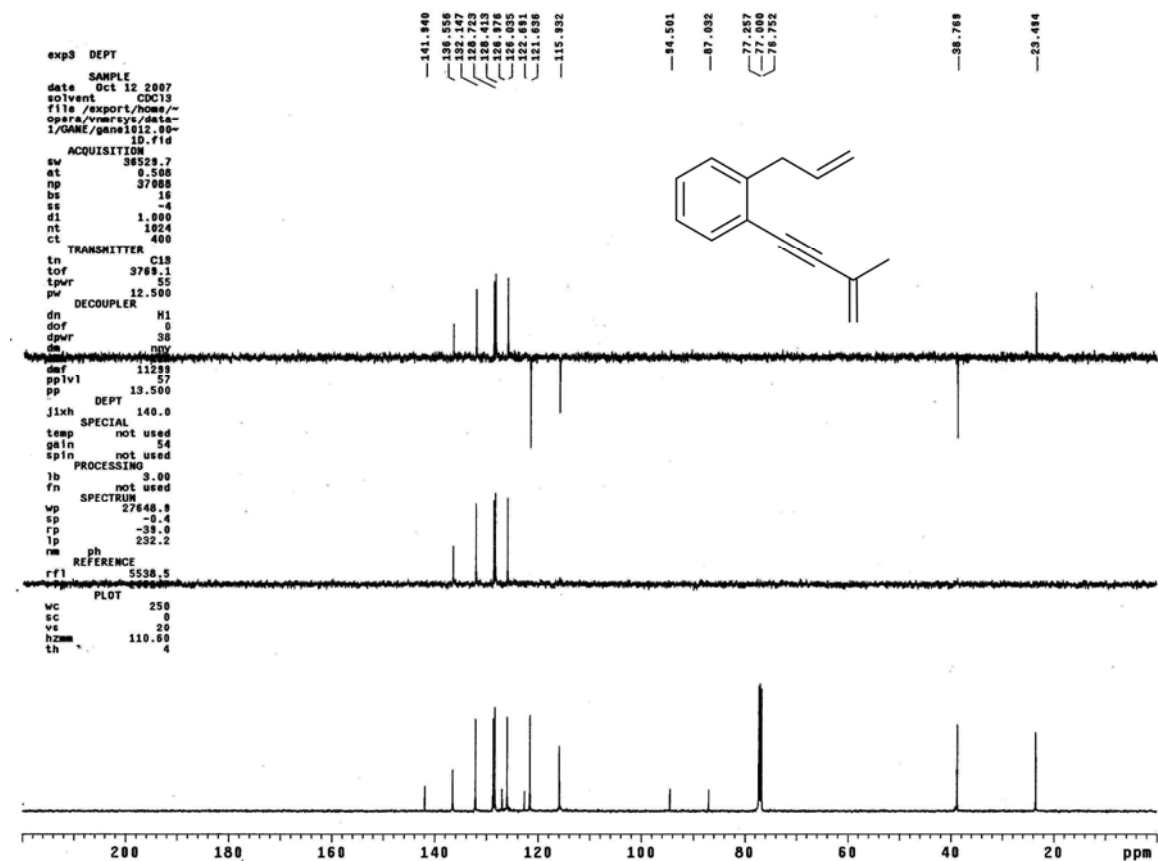

$^1\text{H}$  and  $^{13}\text{C}$  NMR spectra of compound **4r**.

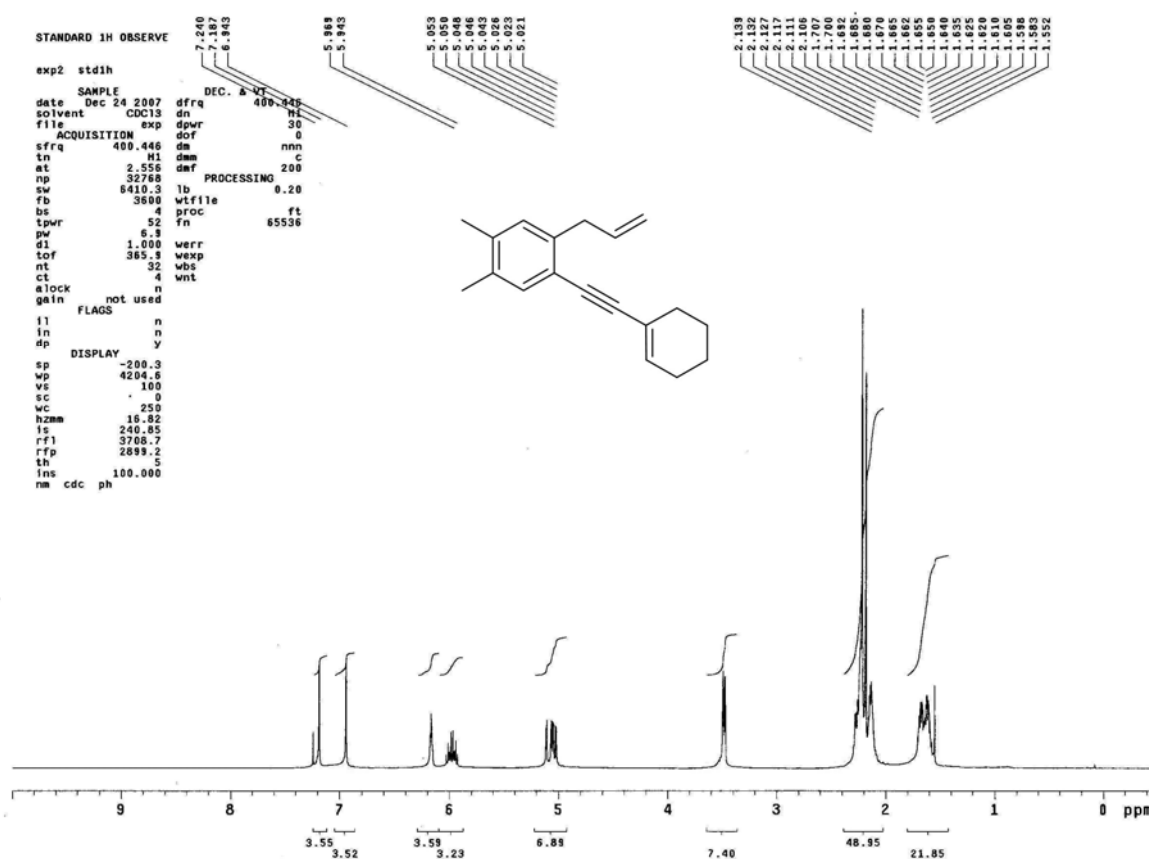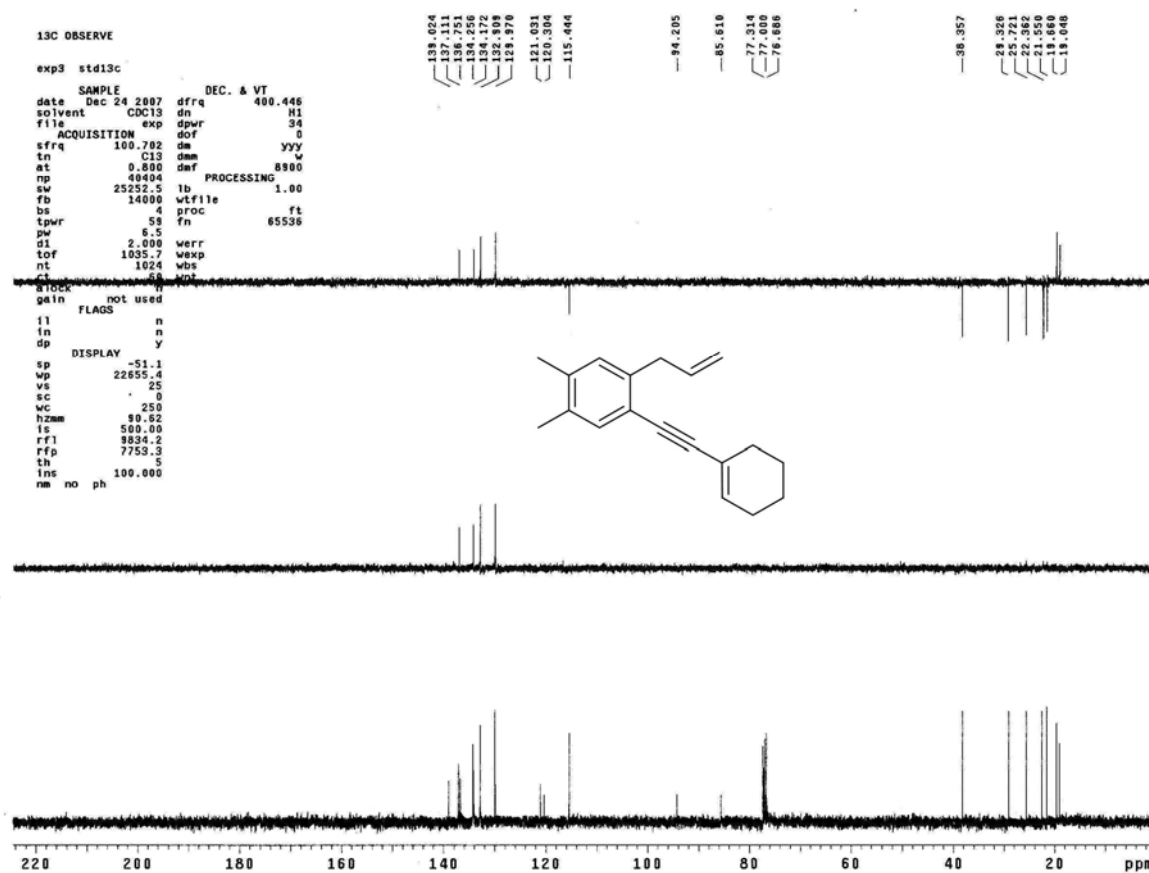

$^1\text{H}$  and  $^{13}\text{C}$  NMR spectra of compound **4s**.

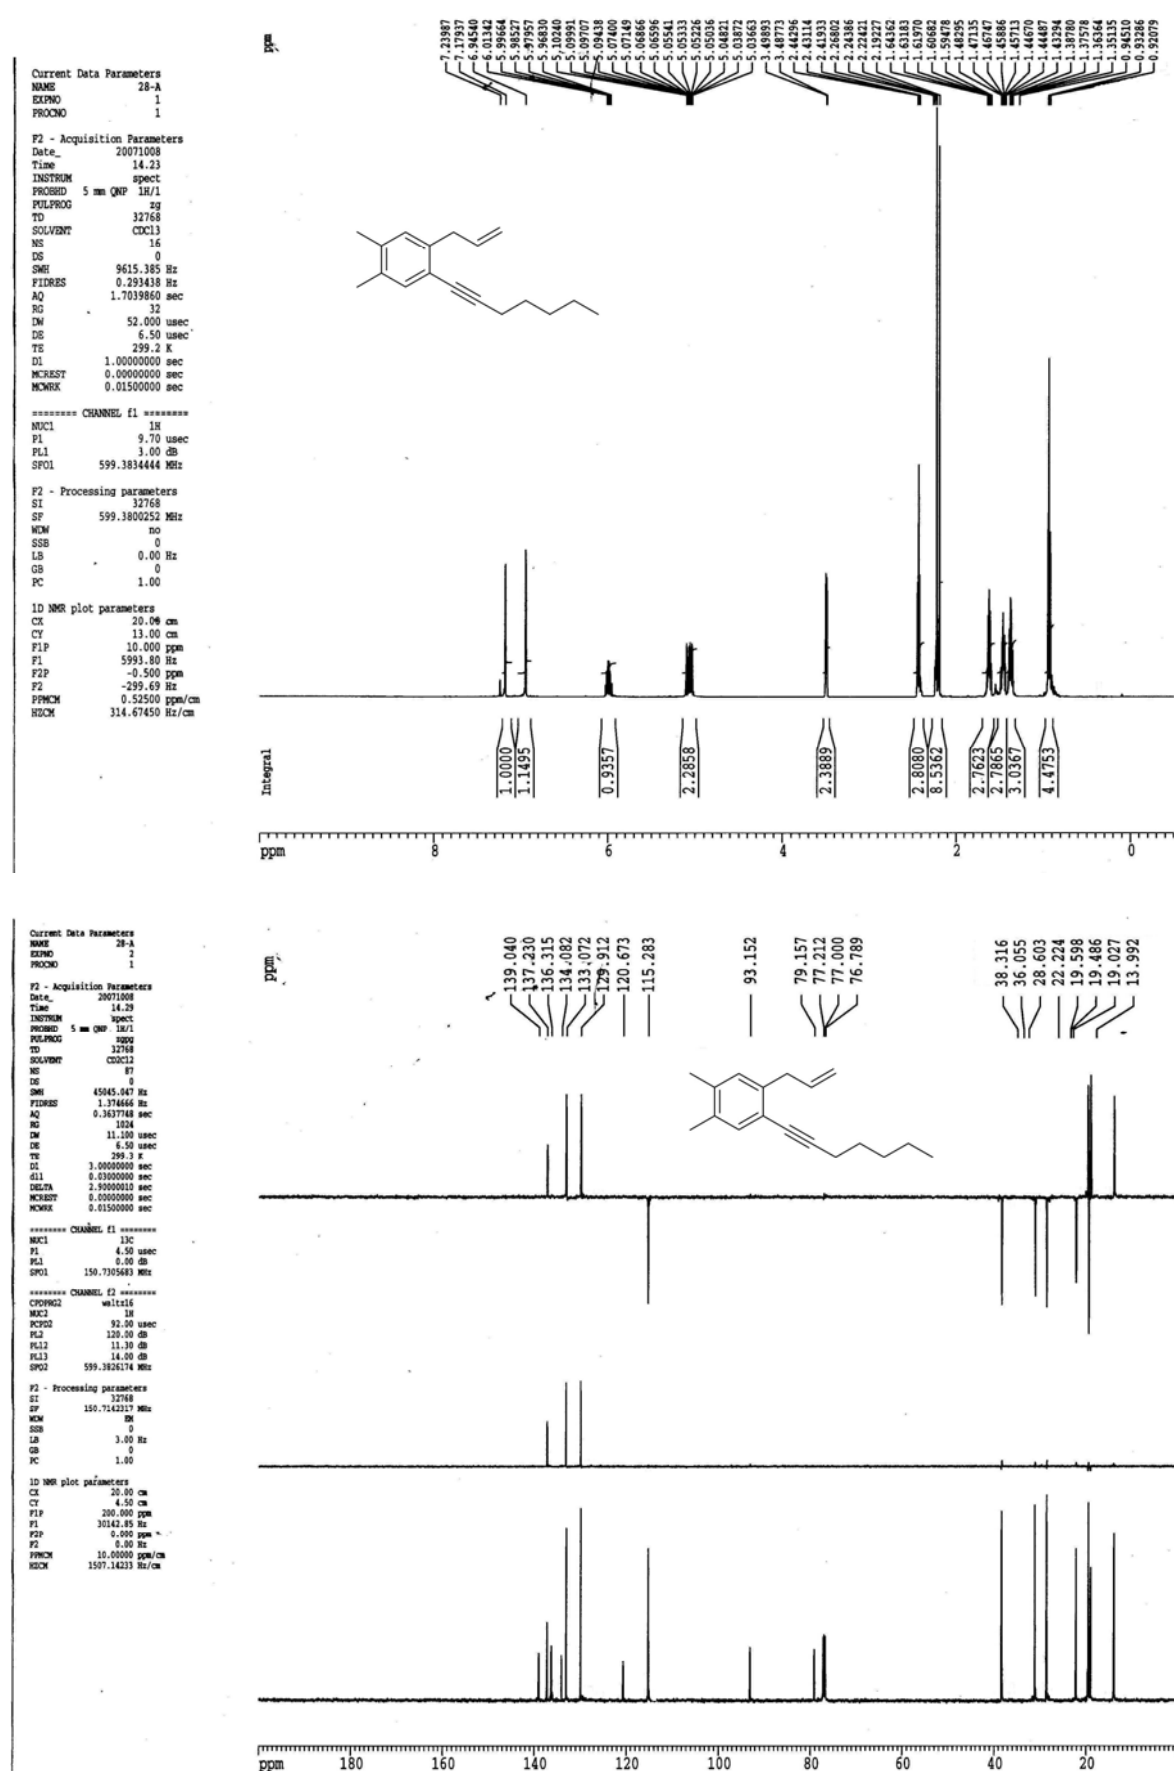

$^1\text{H}$  and  $^{13}\text{C}$  NMR spectra of compound **4t**.

Current Data Parameters  
NAME Jegan-127-B  
EXPNO 1  
PROCNO 1

F2 - Acquisition Parameters  
Date\_ 20071024  
Time 20.09  
INSTRUM spect  
PROBHD 5 mm QNP 1H/1  
PULPROG zgpg  
TD 32768  
SOLVENT CDCl3  
NS 16  
DS 0  
SWH 9615.385 Hz  
FIDRES 0.291438 Hz  
AQ 1.7019860 sec  
RG 32  
DN 52.000 usec  
DE 6.50 usec  
TE 303.0 K  
D1 1.00000000 sec  
MCREST 0.00000000 sec  
MCMRK 0.01500000 sec

\*\*\*\*\* CHANNEL f1 \*\*\*\*\*  
NUC1 1H  
P1 9.70 usec  
PL1 3.00 dB  
SFO1 599.3814444 MHz

F2 - Processing parameters  
SI 32768  
SF 599.3800249 MHz  
WDW no  
SSB 0  
LB 0.00 Hz  
GB 0  
PC 1.00

1D NMR plot parameters  
CX 20.00 cm  
CY 10.00 cm  
F1P 11.000 ppm  
F1 6593.118 Hz  
F2P -0.500 ppm  
F2 -299.69 Hz  
PPMCM 0.57500 ppm/cm  
HZCM 344.64349 Hz/cm

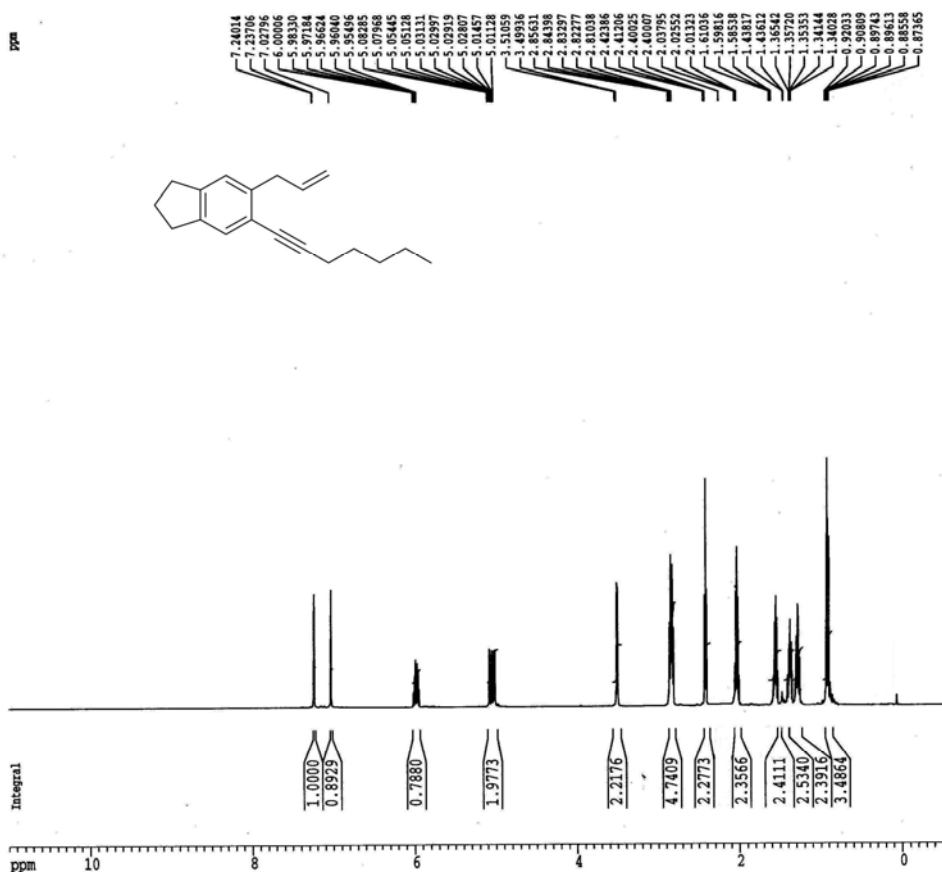

Current Data Parameters  
NAME Jegan-127-B  
EXPNO 2  
PROCNO 1

Acquisition Parameters  
Date\_ 20071024  
Time 20.15  
INSTRUM spect  
PROBHD 5 mm QNP 1H/1  
PULPROG zgpg  
TD 32768  
SOLVENT CDCl3  
NS 160  
DS 0  
SWH 45045.047 Hz  
FIDRES 1.374666 Hz  
AQ 0.3637748 sec  
RG 1024  
DN 11.100 usec  
DE 4.50 usec  
TE 303.0 K  
D1 3.00000000 sec  
MCREST 0.00000000 sec  
MCMRK 0.01500000 sec

\*\*\*\*\* CHANNEL f1 \*\*\*\*\*  
NUC1 13C  
P1 4.50 usec  
PL1 0.00 dB  
SFO1 150.7255683 MHz

\*\*\*\*\* CHANNEL f2 \*\*\*\*\*  
CPDPRG2 waltz16  
NUC2 1H  
P2 92.00 usec  
PL2 120.00 dB  
PL3 11.30 dB  
PL4 14.00 dB  
SFO2 599.3826174 MHz

Processing parameters  
SI 32768  
SF 150.7142249 MHz  
WDW EM  
SSB 0  
LB 3.00 Hz  
GB 0  
PC 1.00

1D NMR plot parameters  
CX 20.00 cm  
CY 4.50 cm  
F1P 200.000 ppm  
F1 70142.84 Hz  
F2P 0.000 ppm  
F2 0.00 Hz  
PPMCM 10.00000 ppm/cm  
HZCM 1507.14221 Hz/cm

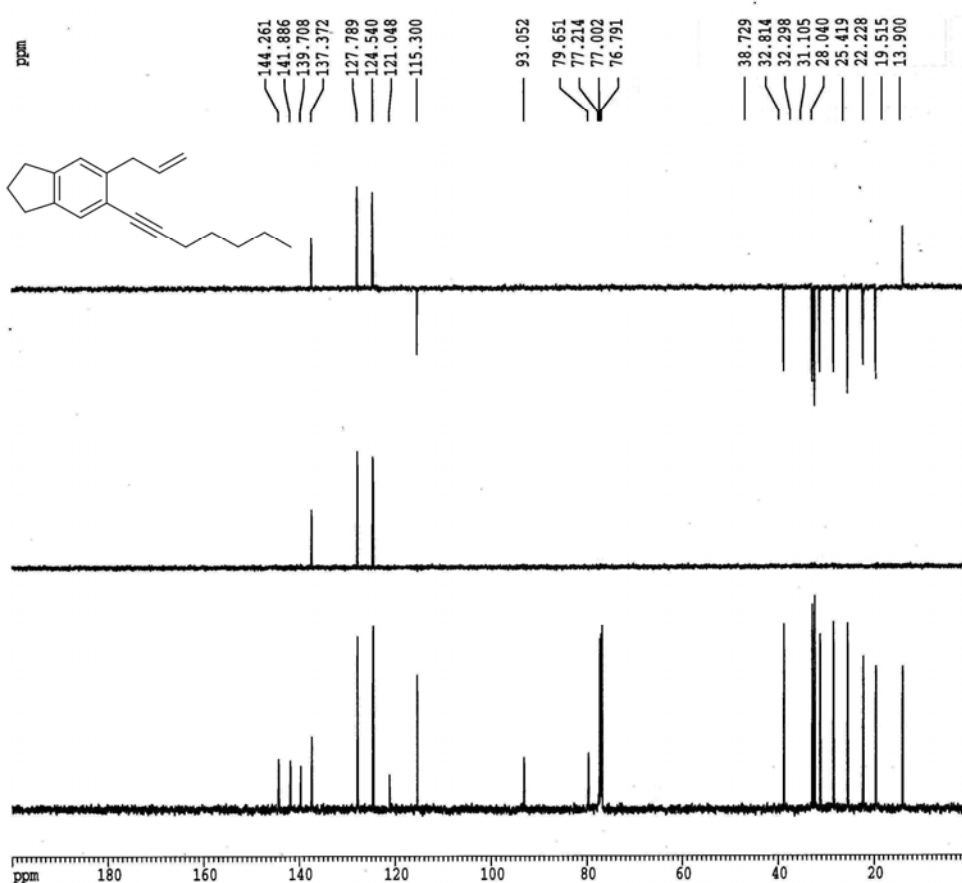

$^1\text{H}$  and  $^{13}\text{C}$  NMR spectra of compound **4u**.

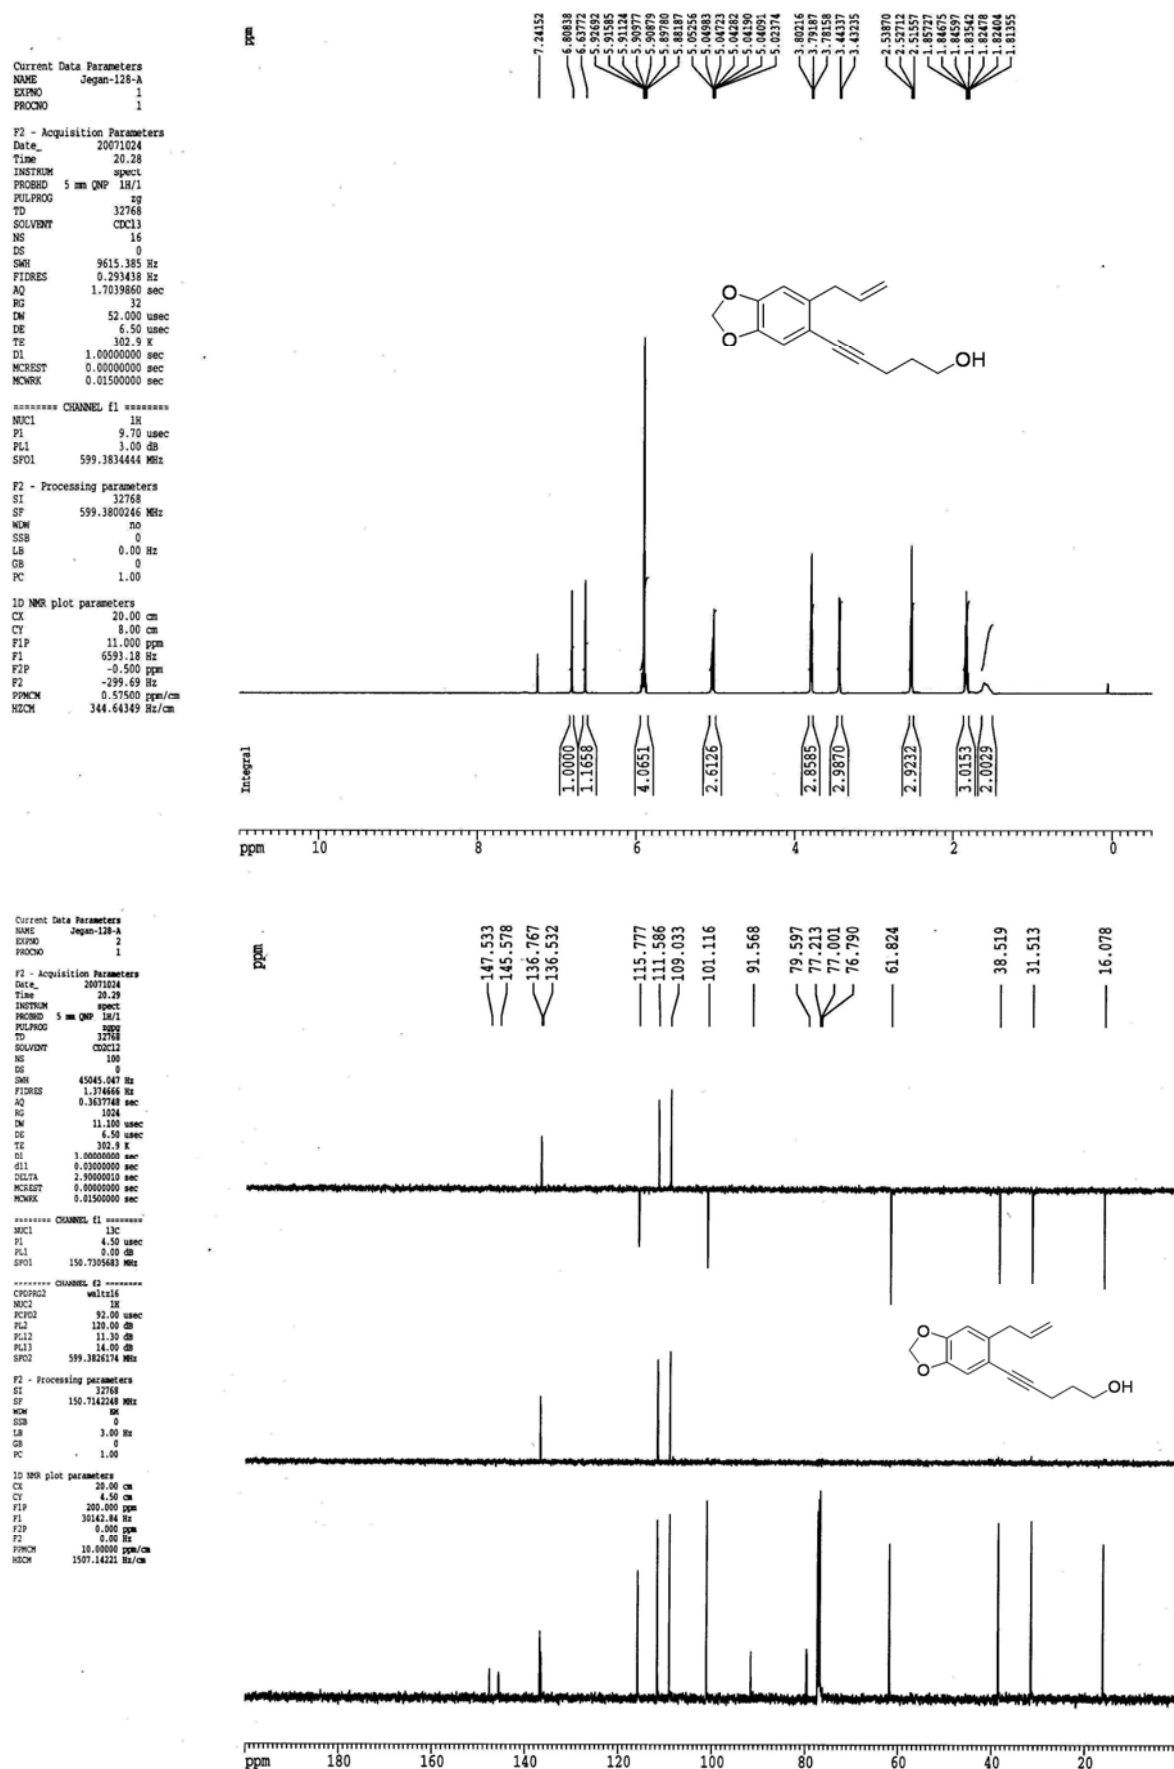

$^1\text{H}$  NMR spectrum of compounds **4v** and **4v'**.

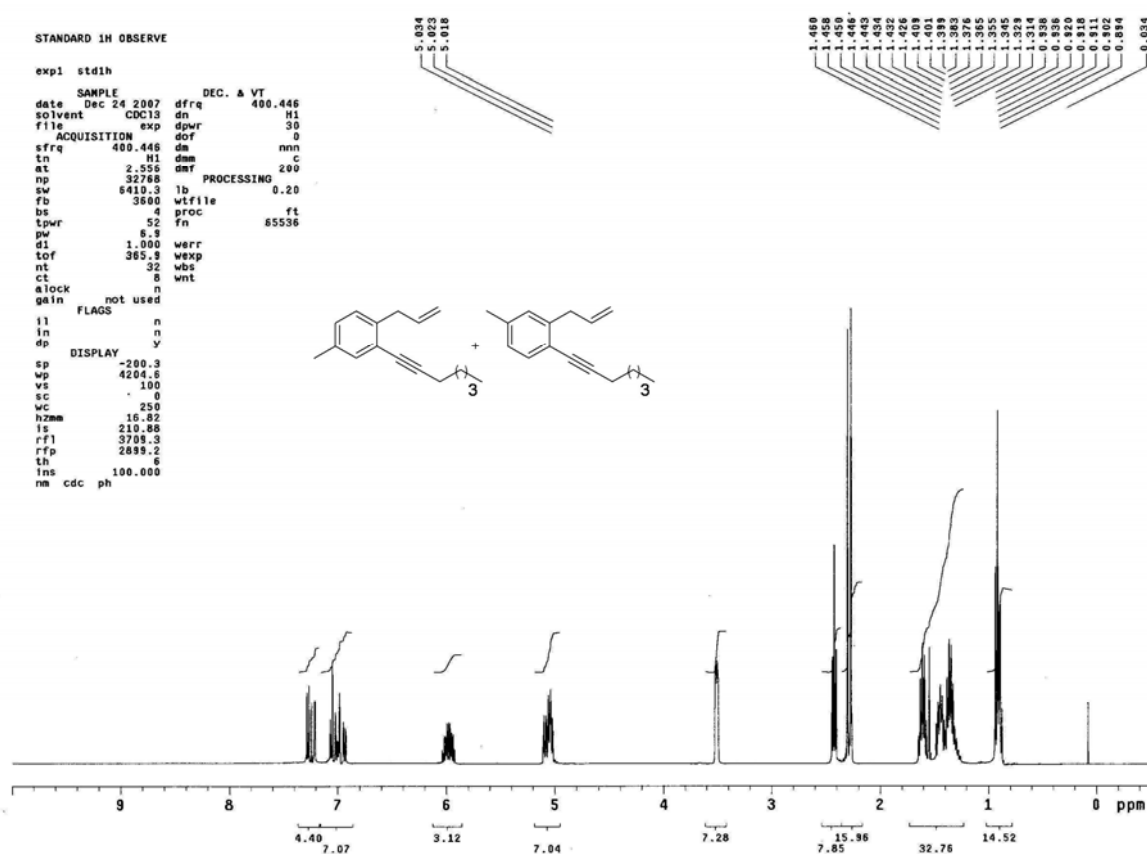

Supplement: b800118a.pdf [file b800118a.pdf]
